1 **The role of trehalose 6-phosphate in shoot branching – local and non-local effects on axillary bud**  
2 **outgrowth in arabidopsis rosettes**

3

4 Franziska Fichtner<sup>1,2,\*</sup>, Francois F. Barbier<sup>3</sup>, Maria G. Annunziata<sup>1</sup>, Regina Feil<sup>1</sup>, Justyna J. Olas<sup>4</sup>, Bernd  
5 Mueller-Roeber<sup>1,4</sup>, Mark Stitt<sup>1</sup>, Christine A. Beveridge<sup>3</sup> and John E. Lunn<sup>1\*</sup>

6

7 <sup>1</sup>Max Planck Institute of Molecular Plant Physiology, 14476 Potsdam-Golm, Germany,

8 <sup>2</sup>Current address: School of Biological Sciences, The University of Queensland, St. Lucia, QLD  
9 4072, Australia

10 <sup>3</sup>School of Biological Sciences, The University of Queensland, St. Lucia, QLD 4072, Australia,

11 <sup>4</sup>University of Potsdam, Institute of Biochemistry and Biology, Karl-Liebknecht-Straße 24-25, Haus 20,  
12 14476 Potsdam, Germany

13

14 \*Authors for correspondence: Franziska Fichtner ([f.fichtner@uq.edu.au](mailto:f.fichtner@uq.edu.au)) and John E. Lunn  
15 ([lunn@mpimp-golm.mpg.de](mailto:lunn@mpimp-golm.mpg.de); +49 331 567 8171)

16 **SUMMARY**

- 17 - Trehalose 6-phosphate (Tre6P) is a sucrose signalling metabolite that has been implicated in  
18 regulation of shoot branching, but its precise role is not understood.
- 19 - We expressed tagged forms of TREHALOSE-6-PHOSPHATE SYNTHASE1 (TPS1) to determine  
20 where Tre6P is synthesized in arabidopsis (*Arabidopsis thaliana*), and investigated the impact  
21 of localized changes in Tre6P levels, in axillary buds or vascular tissues, on shoot branching in  
22 wild-type and branching mutant backgrounds.
- 23 - TPS1 is expressed in axillary buds and the subtending vasculature, as well as in the leaf and  
24 stem vasculature. Expression of a heterologous trehalose-6-phosphate phosphatase (TPP) to  
25 lower Tre6P in axillary buds strongly delayed bud outgrowth in long days and inhibited  
26 branching in short days. TPP expression in the vasculature also delayed lateral bud outgrowth  
27 and decreased branching. Increased Tre6P in the vasculature enhanced branching and was  
28 accompanied by higher expression of *FLOWERING LOCUS T (FT)* and up-regulation of sucrose  
29 transporters. Increased vascular Tre6P levels enhanced branching in *branded1* but not in *ft*  
30 mutant backgrounds.
- 31 - These results provide direct genetic evidence of a local role for Tre6P in regulation of axillary  
32 bud outgrowth within the buds themselves, and also connect Tre6P with systemic regulation  
33 of shoot branching via FT.

34

35 Key words: *Arabidopsis thaliana* (arabidopsis), axillary bud, branching, sucrose, sugar signalling,  
36 trehalose 6-phosphate

## 37 INTRODUCTION

38 Shoot architecture is a highly plastic trait that influences plant fitness in the wild and the productivity  
39 of crop plants (Patrick and Colyvas, 2014). In many plants, the shoot apex inhibits the outgrowth of  
40 axillary (lateral) buds, prioritizing allocation of resources towards growth of the main stem. This  
41 phenomenon is known as apical dominance. Removal of the shoot apex, by herbivory or pruning, leads  
42 to the release of dormancy in axillary buds allowing them to grow out to form new branches. Since  
43 the 1930s, there has been a general consensus that auxin is the main signal responsible for apical  
44 dominance (Barbier et al., 2019). Auxin is produced in the young leaves at the shoot tip and  
45 transported down towards the roots, inhibiting the outgrowth of axillary buds along the shoot (Dun  
46 et al., 2009; Muller and Leyser, 2011; Brewer et al., 2013). Although the polar auxin stream in the stem  
47 inhibits bud outgrowth, auxin derived from the shoot tip does not itself move into axillary buds.  
48 Instead it acts via two other phytohormones: strigolactones and cytokinins (Wickson and Thimann  
49 1958; Sachs and Thimann 1967; Gomez-Roldan et al., 2008; Umehara et al., 2008), which have  
50 antagonistic effects on axillary buds (Brewer et al., 2009; Ferguson and Beveridge, 2009; Dun et al.,  
51 2012, 2013). Auxin enhances synthesis of strigolactones, which inhibit axillary bud growth (Shimizu-  
52 Sato et al., 2009; Domagalska et al., 2011), partly via induction of the BRANCHED1 (BRC1) transcription  
53 factor, which is a repressor of branching (Aguilar-Martinez et al., 2007; Braun et al., 2012; Dun et al.,  
54 2009, 2012). Conversely, auxin inhibits biosynthesis of cytokinins, which promote axillary bud  
55 outgrowth, in part by repression of *BRC1* expression (Braun et al., 2012; Dun et al., 2012). A more  
56 recent concept is the auxin canalization model. This postulates that the inability of axillary buds to  
57 export auxin produced in the bud is responsible for their dormancy, and that outgrowth occurs when  
58 the buds are able to establish their own polar auxin stream (Prusinkiewicz et al., 2009; Muller and  
59 Leyser, 2011).

60 Although these phytohormones undoubtedly play a major role in regulation of shoot  
61 branching, decapitation experiments in garden pea (*Pisum sativum*) questioned their involvement in  
62 the initial outgrowth of axillary buds. Decapitation leads to changes in the sucrose supply at the level  
63 of the lower buds that are highly correlated with the timing of bud outgrowth (Mason et al., 2014;  
64 Fichtner et al., 2017). Increasing the sucrose supply to axillary buds by feeding sucrose exogenously or  
65 removing the rapidly expanding leaves (i.e. competing sinks) also triggered bud growth, even when  
66 the shoot apex itself was left intact to maintain polar auxin flow (Mason et al., 2014). Exogenous  
67 sucrose also triggered bud outgrowth in isolated stem sections from pea, rose (*Rosa hybrida*) and  
68 arabidopsis (Barbier et al., 2015b; Fichtner et al., 2017), even in the presence of auxin in the growth  
69 medium (Bertheloot et al., 2020). Together, these studies provide direct evidence that changes in  
70 sucrose supply are the initial signal that releases bud dormancy after decapitation. Observations in

71 other species are consistent with sucrose supply playing an important role in shoot branching (Kebrom  
72 et al., 2010; 2012; Barbier et al., 2015a; Martín-Fontecha et al., 2018; Barbier et al., 2019b), with  
73 dormant buds displaying a carbon starvation-like transcript profile (Tarancón et al., 2017).

74 Trehalose 6-phosphate (Tre6P) is an essential signal metabolite in plants. The sucrose-Tre6P  
75 nexus model proposes that Tre6P signals the availability of sucrose (Lunn et al., 2006) and acts as a  
76 negative feedback regulator of sucrose levels (Yadav et al., 2014; Figueroa and Lunn, 2016). Tre6P is  
77 synthesized from UDP-glucose and glucose 6-phosphate by Tre6P synthase (TPS), and  
78 dephosphorylated to trehalose by Tre6P phosphatase (TPP). In arabidopsis, transcripts of several *TPS*  
79 and *TPP* genes have been detected in meristems and axillary buds, and the expression of many of  
80 these genes is influenced by sugars and phytohormones (Osuna et al., 2007; Ramon et al., 2009; Yadav  
81 et al., 2014). Transcriptomic and phenotypic analyses of various mutants have implicated Tre6P in  
82 shoot and inflorescence branching in arabidopsis (Schluepmann et al., 2003), and in other species  
83 (Kebrom and Mullet, 2016). In maize (*Zea mays*), inflorescence branching is increased by mutations in  
84 two *TPP* genes – *ZmRAMOSA3* and *ZmTPP4* – that disrupt putative Tre6P signalling functions (Satoh-  
85 Nagasawa et al., 2006; Claeys et al., 2019).

86 We recently demonstrated that Tre6P rapidly accumulates in pea axillary buds after  
87 decapitation, and that the rise in bud Tre6P levels following decapitation is dependent on sucrose  
88 (Fichtner et al., 2017). Although the rise in bud Tre6P levels coincided with the onset of bud  
89 outgrowth, its physiological significance is not yet known (Fichtner et al., 2017). In maize, *grassy*  
90 *tillers1* and *teosinte branched1* mutants are highly branched because the tiller buds fail to establish  
91 dormancy, and this trait is associated with tiller buds having elevated levels of Tre6P (Dong et al.,  
92 2019).

93 There is circumstantial evidence that Tre6P might also have a more remote influence on  
94 axillary buds and shoot branching, in particular via effects on the expression of the florigenic protein  
95 FLOWERING LOCUS T (FT; Wahl et al., 2013). FT is synthesized in the phloem companion cells in leaves  
96 and moves in the phloem sieve elements to the shoot apical meristem (SAM), where it interacts with  
97 the FLOWERING LOCUS D protein to promote the floral transition (Turck et al., 2008). In arabidopsis,  
98 FT and its close homologue, TWIN SISTER OF FT (TSF), interact with the branching repressor BRC1 in  
99 axillary buds (Niwa et al., 2013). In rice (*Oryza sativa*), a homologue of FT has been shown to regulate  
100 tillering (Tsuji et al., 2015), and there is evidence for an increase in branching mediated by up-  
101 regulation of FT in tomato (*Solanum lycopersicum*; Weng et al., 2016) or expression of a heterologous  
102 FT in tobacco (*Nicotiana tabacum*; Li et al., 2015). In pea, one FT homologue, GIGAS, has also been  
103 implicated in the regulation of bud outgrowth (Beveridge and Murfet, 1996; Hecht et al., 2011).

104 We hypothesize that Tre6P influences shoot branching in multiple ways, acting both locally  
105 within axillary buds and more remotely in the phloem-loading zone of leaves, potentially linking  
106 axillary bud outgrowth to the local availability of sucrose as well as the overall C-status of the plant.  
107 The aims of this study were to define where Tre6P acts in regulation of axillary bud outgrowth and to  
108 identify interactions with other signalling pathways that affect shoot branching. We used tissue-  
109 specific promoters to bring about localized changes in Tre6P levels in arabidopsis, and investigated  
110 the impact of these changes on shoot branching. We demonstrate that Tre6P plays a central role in  
111 the release of axillary bud dormancy to form new shoot branches.

112

## 113 MATERIALS AND METHODS

114

### 115 Materials

116 Wild type arabidopsis (*Arabidopsis thaliana* [L.] Heynh.) accession Columbia-0 (Col-0) seeds were from  
117 an in-house collection. The *tps1-1* lines complemented with  $\beta$ -GLUCURONIDASE- or GFP-tagged forms  
118 of TPS1 or with the *Escherichia coli* TPS (OtsA) were those described in Fichtner et al. (2020).

119

### 120 Molecular cloning

121 For expression of genes of interest under the control of the *BRC1* (*BRANCHED1*, At3g18550) promoter,  
122 a 1-kbp genomic region upstream of the start codon of the *BRC1* gene was used. The *GLYCINE-*  
123 *DECARBOXYLASE P-SUBUNIT A* (*GLDPA*) promoter from the C<sub>4</sub> plant *Flaveria trinervia* was amplified  
124 from the previously used FtGLDPA5'-pBI121 plasmid (see Engelmann et al., 2008), resulting in a 1.5-  
125 kbp promoter fragment. All promoter sequences were integrated into pGreenII plasmids  
126 (www.pgreen.ac.uk; Hellens et al., 2000) that were equipped with the terminator of the agrobacterial  
127 *octopine synthase* gene. The *otsA* gene from *E. coli* (strain K12) was amplified from *E. coli* DNA and the  
128 genetic sequences of *CeTPP/GOB-1*, codon-optimized for expression in arabidopsis, was synthesized  
129 and cloned by GenScript (www.genscript.com) and sub-cloned into the pGreenII plasmid.

130

### 131 Arabidopsis transformation

132 Gene constructs were introduced into arabidopsis Col-0 by *Agrobacterium tumefaciens* mediated  
133 (floral dipping (Clough and Bent, 1998). Primary transformants were selected by spraying with 0.05%  
134 (v/v) glufosinate. Lines that showed a 3:1 segregation of resistant:susceptible individuals in the T<sub>2</sub>  
135 generation, indicating a single transgenic locus, were chosen for further propagation. Progeny from  
136 such lines were screened by glufosinate selection in the T<sub>3</sub> generation to identify homozygous lines  
137 for each transgene by survival assays.

138 **Plant growth conditions**

139 All arabidopsis seeds were stratified for 3 days at 4°C and grown for 7 days on solid half-strength MS  
140 plates (Murashige and Skoog, 1962) and then transferred to a 1:1 mixture of vermiculite and soil  
141 (Stender, [www.stender.de](http://www.stender.de)). Plants were grown in controlled environment chambers fitted with  
142 fluorescent lamps (Annunziata et al., 2017), with 8-h, 16-h or 18-h photoperiods, 150  $\mu\text{mol m}^{-2} \text{s}^{-1}$   
143 irradiance and day/night temperatures of 22°C/18°C. Unless stated otherwise, plants were harvested  
144 10 h after dawn (ZT10). The age of the plants at harvest is indicated for each individual experiment.  
145 Bud enriched material was obtained from rosettes by removing all leaves as well as the hypocotyl,  
146 leaving only the inner stem regions and shoot apex. For vascular enriched material, the leaf mid-veins  
147 of three plants were dissected and pooled. Dormant axillary buds were collected from 15 plants one  
148 week after bolting.

149

150 **Phenotyping**

151 Flowering time was determined as total leaf number (rosette + cauline leaves). Rosette and cauline  
152 leaves were counted separately, and the rosette leaf number was used to determine RI number per  
153 leaf. Shoots were counted either when they had finished flowering and fully senesced or every 2 d  
154 after bolting. Every shoot with a size  $\geq 0.5$  cm was counted.

155

156 **Microscopy**

157  *$\beta$ -Glucuronidase (GUS) reporter assay*: Plants were placed in GUS staining solution (50 mM sodium-  
158 phosphate buffer (pH 7), 5 mM  $\text{K}_3[\text{Fe}(\text{CN})_6]$ , 5 mM  $\text{K}_4[\text{Fe}(\text{CN})_6]$ , and 1 mM 5-bromo-4-chloro-3-indolyl-  
159 beta-D-glucuronic acid (X-Gluc). After incubation at 37°C in the dark overnight, the tissue was  
160 destained by washing several times with 70% (v/v) ethanol. Meristems were harvested, fixed and  
161 embedded in wax as described in Olas et al. (2019). Leaves were fixed with Technovit® 7100 (Kulzer,  
162 [www.kulzer-technik.de](http://www.kulzer-technik.de)) according to the manufacturer's instructions. Sections (4- $\mu\text{m}$ ) were cut using  
163 a Leica Rotary Microtome RM2265 (Leica Biosystems, [www.leicabiosystems.com](http://www.leicabiosystems.com)) and observed under  
164 an Olympus BX-51 Epi-Fluorescence Microscope fitted with a DC View III camera and operated using  
165 CellSense software (Olympus, [www.olympus-lifescience.com](http://www.olympus-lifescience.com)). Non-sectioned plant material was  
166 examined using either the microscope described above or a Leica Stereomicroscope MZ12.5 fitted  
167 with a DC 420 camera and operated with LAS software (Leica Biosystems).

168 *GFP-reporter lines*: GREEN FLUORESCENT PROTEIN (GFP) expression was detected using a Leica TCS  
169 SP8 Spectral Laser Scanning Confocal motorized Microscope operated with LAS X software (Leica  
170 Biosystems; [www.leica.com](http://www.leica.com)). Overlays were done using the image processing package Fiji for ImageJ  
171 (<https://fiji.sc/>).

172 **Immunoblotting**

173 Expression of heterologous proteins was confirmed by immunoblotting as described previously  
174 (Martins et al. 2013). The following primary antibodies were used: (i) rabbit anti-OtsA (Martins et al.,  
175 2013; 1:3,000 dilution) or (ii) rabbit anti-CeTPP kindly provided by Dr Carlos Figueroa (MPI-MP,  
176 Potsdam-Golm, Germany; 1:4,000 dilution).

177

178 **Metabolite analysis**

179 Frozen plant tissue was ground to a fine powder at liquid N<sub>2</sub> temperature and water-soluble  
180 metabolites were extracted as described in Lunn et al. (2006). Tre6P, other phosphorylated  
181 intermediates and organic acids were measured by anion-exchange HPLC coupled to tandem mass  
182 spectrometry (Lunn et al., 2006), with modifications as described in Figueroa et al. (2016). Sucrose  
183 was measured enzymatically (Stitt et al., 1989).

184

185 **Gene expression analysis**

186 RNA was extracted using an RNeasy Plant Mini Kit (Qiagen; [www.qiagen.com](http://www.qiagen.com)) following the  
187 manufacturer's instructions. For absolute quantification of transcripts, ArrayControl RNA Spikes  
188 (Applied Biosystems; [www.thermofisher.com/applied/biosystems](http://www.thermofisher.com/applied/biosystems)) were added before RNA extraction  
189 and cDNA synthesis (Flis et al., 2015). Contaminating DNA was removed using a TURBO DNA-free kit,  
190 and reverse transcription was performed using a SuperScript IV First-Standard Synthesis System Kit  
191 (Invitrogen; [www.thermofisher.com/Invitrogen](http://www.thermofisher.com/Invitrogen)). The PCR mix was prepared using Power SYBR Green  
192 PCR Master Mix (Applied Biosystems), and qRT-PCR was performed in a 384-well microplate using an  
193 ABI PRISM 7900 HT sequence detection system (Applied Biosystems). Transcript abundance was  
194 calculated as described in Flis et al. (2015), using spike numbers 1 to 7. Primers used for spike analysis  
195 and qRT-PCR are given in Table S1. Gene expression analysis was also performed as described in  
196 Barbier et al. (2019a). cDNA was synthesized by reverse-transcription using an iScript™ cDNA Synthesis  
197 Kit (Bio-Rad; [www.biorad.com](http://www.biorad.com)). Quantitative Real-Time PCR was performed using a SensiFAST™ SYBR®  
198 No-ROX Kit (Bioline; [www.bioline.com](http://www.bioline.com)). Fluorescence was monitored with a CFX384 thermal cycler  
199 (Bio-Rad). Gene expression was calculated using the  $\Delta\Delta C_t$  method corrected by the primer efficiency,  
200 and *TUBULIN3* and *ACTIN* (combination of *ACT2*, *ACT7* and *ACT8*; Table S1) were used for  
201 normalization.

202

203 **Statistical analysis**

204 Data plotting and statistical analysis were performed using R Studio Version 1.0.143  
205 ([www.rstudio.com](http://www.rstudio.com)) with R version 3.6.2 (<https://cran.r-project.org/>). Data were analysed using an

206 ANOVA based post hoc comparison of means test using the multiple comparison Fisher's least  
207 significant difference (LSD) test. Figures containing micrographs and other images were compiled  
208 using Adobe Illustrator, Microsoft PowerPoint 2010 or ImageJ software (<https://imagej.nih.gov/ij/>).

## 209 RESULTS

### 210 Localization and function of TPS1 in arabidopsis axillary buds

211 TPS1 is the predominant enzymatic source of Tre6P in arabidopsis, except in the endosperm of  
212 developing seeds (Delorge et al., 2015). To assess the potential for Tre6P synthesis in axillary buds, we  
213 complemented the embryo-lethal arabidopsis *tps1-1* null mutant with constructs encoding full-length  
214 TPS1 proteins tagged at either the N- or C-terminus with  $\beta$ -GLUCURONIDASE (GUS) or GREEN  
215 FLUORESCENT PROTEIN (GFP) (Fig. 1a). Expression of the TPS1 fusion proteins was under the control  
216 of the endogenous *TPS1* promoter and other potential regulatory elements from the *TPS1* genomic  
217 locus, and the complemented lines showed normal embryonic and post-embryonic growth (Fichtner  
218 et al., 2020; Fig. 1a). GUS/GFP-tagged TPS1 was detected in axillary buds (Fig. 1b-e), with strong  
219 expression also in the subtending vasculature, but there was little or no expression in leaf primordia  
220 or the central meristematic zone of the axillary buds (Fig. 1b-e). This was similar to the expression  
221 pattern of TPS1 in the main shoot apex. Before bolting, TPS1 was detected in the flanks and rib zone  
222 of the SAM, and in the proto-vasculature subtending the SAM (Fig. 1e), consistent with previous  
223 studies of the same reporter lines (Fichtner et al., 2020). Similarly, TPS1 was present in the vasculature  
224 subtending the inflorescence SAM as well as in cauline axillary meristems (Fig. 1g).

225 The synthesis of Tre6P is the primary function of TPS1. However, some trehalose pathway  
226 enzymes are known to have non-catalytic functions as well, including at least two TPP isoforms that  
227 influence inflorescence branching in maize (Claeys et al., 2019). To investigate the dependence of  
228 shoot branching in arabidopsis on TPS1, we analyzed shoot branching patterns in two independent  
229 transgenic lines in the *tps1-1* null mutant background, in which loss of TPS1 had been complemented  
230 by expression of the *E. coli* TPS (OtsA) under the control of the *TPS1* promoter and other *TPS1* gene  
231 regulatory elements (Fig. 1a). These lines have no detectable TPS1 protein but wild-type levels of  
232 Tre6P (Fichtner et al., 2020). Thus, by comparing these with wild-type plants and a *tps1-1* mutant line  
233 complemented with *TPS1*, we can determine the dependence of any phenotypes on Tre6P. Both OtsA-  
234 complemented lines had the same number of primary rosette (RI) and cauline (CI) branches as wild-  
235 type plants and *TPS1*-complemented control plants, showing that Tre6P, rather than the TPS1 protein,  
236 is a key factor in regulation of shoot branching (Fig. 1h,i).



237 Together, these results indicate that there is the enzymatic capacity for Tre6P synthesis in  
238 axillary meristems and buds, and that replacement of the Tre6P-synthesizing function of TPS1 by OtsA  
239 is sufficient to restore wild-type patterns of shoot branching in the *tps1-1* mutant background.

240

#### 241 **Expression of a heterologous TPP in axillary buds suppresses branching**

242 To determine whether Tre6P is required for release of axillary bud dormancy and outgrowth into new  
243 shoots, we expressed a heterologous TPP in axillary buds to lower their Tre6P content. We used the  
244 promoter of the arabidopsis *BRC1* gene, which is predominantly expressed in axillary buds (Aguilar-  
245 Martinez et al., 2007), to drive expression of a heterologous TPP from *Caenorhabditis elegans* (CeTPP),  
246 whose  $K_m$  for Tre6P (0.1-0.15 mM; Kormish and McGhee, 2005) is in a similar range to estimates of *in-*  
247  *vivo* Tre6P concentrations in plants (Martins et al., 2013). CeTPP is phylogenetically unrelated to plant  
248 TPPs, so is likely to have unregulated activity when expressed in plants and unlikely to have any  
249 physiological interactions with plant proteins. Therefore, any phenotypic effects arising from its  
250 expression in axillary buds could be ascribed solely to changes in Tre6P levels. We also generated  
251 several independent GUS and GFP reporter lines to confirm the expression pattern mediated by the  
252 *BRC1* promoter.

253 In the inflorescence apex, *pBRC1*-driven GUS expression was visible in axillary meristems and  
254 in the epidermis of young leaves (Fig. 2a shows representative images from several independent lines),  
255 consistent with the predominant expression in axillary buds described previously (Aguilar-Martinez et  
256 al., 2007). Upon bolting, GUS expression was visible in axillary meristems of cauline leaves as well as  
257 in axillary buds of rosette leaves (Fig. 2a). Consistent with the GUS expression results, GFP  
258 fluorescence was detected in axillary buds of *pBRC1:GFP* lines (Fig. S1a). To confirm transgene  
259 expression in the *pBRC1* lines, mature axillary buds and fully expanded leaves were harvested from  
260 wild-type Col-0, *pBRC1:GUS* and *pBRC1:CeTPP* lines at one week after bolting for immunoblot analysis  
261 (Fig. 2b). In both of the *pBRC1:CeTPP* lines, an immunoreactive protein of the expected size of CeTPP  
262 (51 kDa) was detected only in the axillary bud material, with no detectable CeTPP protein in fully  
263 expanded leaf tissue (Fig. 2b). This confirms specific expression in mature axillary buds in these lines.

264 We also measured Tre6P and sucrose levels in tissue samples from rosette cores, enriched in  
265 axillary meristems and buds, at various stages of development: at 21 days after sowing (DAS), when  
266 the plants had undergone the floral transition and produced axillary meristems, and at 31 DAS, when  
267 axillary buds had formed. The level of Tre6P was significantly decreased in *pBRC1:CeTPP* line #8 at 21  
268 DAS, while sucrose was significantly increased in *pBRC1:CeTPP* line #11 at 21 DAS (Fig. 2c). The  
269 Tre6P:sucrose ratio was significantly decreased in *pBRC1:CeTPP* line #8 at 21 DAS and in *pBRC1:CeTPP*  
270 line #11 at both time points (Fig. 2c,d).

271 The *pBRC1:CeTPP* plants with lower levels of Tre6P in axillary buds did not show any obvious  
272 changes in their vegetative growth pattern (Fig. S2). Similarly, flowering time and final RI branch  
273 number were unchanged (Fig. 2e,f; Fig. S4a). However, when branching was scored in short-day  
274 conditions (8-h photoperiod), RI number was drastically reduced in the *pBRC1:CeTPP* lines compared  
275 to the controls (Fig. 2g). We also analysed the difference in bud outgrowth by monitoring RI branch  
276 emergence over time in a 16-h photoperiod. Since independent lines showed consistent phenotypes,  
277 we focussed on a single line that showed the strongest accumulation of CeTPP protein (*pBRC1:CeTPP*  
278 line #11). The emergence of RI branches was strongly delayed in the *pBRC1:CeTPP* plants, with the  
279 first appearance of RI branches occurring about 8 d later than in the controls. The emergence of  
280 further RI branches was also noticeably slower in the *pBRC1:CeTPP* plants. As seen before, the final  
281 number of RI branches was the same in *pBRC1:CeTPP* and control plants (Fig. 2f,h), indicating that  
282 lowering bud Tre6P levels delays the initiation and rate of bud outgrowth, but does not affect the  
283 number of buds that eventually do form RI branches in long days. However, lowering Tre6P in axillary  
284 buds under carbon limiting conditions (e.g. short days) can successfully inhibit branching in  
285 arabidopsis.

286

### 287 **Tre6P levels in the vasculature affect shoot branching in arabidopsis**

288 Arabidopsis is an apoplastic phloem loading species, in which sucrose is released from phloem  
289 parenchyma cells into the apoplast via SUCROSE WILL EVENTUALLY BE EXPORTED type sucrose  
290 effluxers (SWEET11 and SWEET12) and then actively taken up into the companion cell-sieve element  
291 complex by the SUT1/SUC2 sucrose-H<sup>+</sup> symporter (Lalonde et al., 2003; Baker et al., 2012; Chen et al.,  
292 2012; Eom et al., 2015; Zakhartsev et al., 2016). In arabidopsis leaves, the leaf vasculature is a major  
293 site of TPS1 expression, and by implication Tre6P synthesis and signalling (Fig. 1; Fichtner et al., 2020).  
294 The phloem-loading zone where TPS1 is expressed lies at the interface between source and sink  
295 tissues and is therefore a strategically important site for systemic signalling. To investigate the  
296 potential of Tre6P synthesis in the vasculature to influence shoot branching, we modified Tre6P levels  
297 preferentially in vascular tissues. We used the promoter of the *GLYCINE-DECARBOXYLASE P-SUBUNIT*  
298 *A* (*GLDPA*) gene from the C<sub>4</sub> plant *Flaveria trinervia* to drive specific expression of *otsA* or *CeTPP* to  
299 increase or decrease Tre6P, respectively, in vascular tissues of arabidopsis. The *GLDPA* promoter had  
300 previously been reported to drive specific expression in vascular tissues in arabidopsis (Engelmann et  
301 al., 2008; Wiludda et al., 2012; Aubry et al., 2014), which for brevity we shall refer to collectively as  
302 the vasculature. We also generated *pGLDPA:GUS* and *pGLDPA:GFP* reporter lines to verify the  
303 expression pattern of the *GLDPA* promoter in arabidopsis. For comparison, we expressed *otsA* under  
304 the control of the constitutive Cauliflower Mosaic Virus 35S promoter, as this had previously been

305 reported to give a bushy phenotype (Schluepmann et al., 2003), although no quantitative analysis of  
306 shoot branching was reported.

307 GUS activity was localized to the vascular tissue in the leaves and petioles of *pGLDPA:GUS*  
308 lines (Fig. 3a, Fig. S1b), with transverse sections showing staining throughout the vascular bundles  
309 (xylem and phloem tissues; Fig. 3a shows representative images from several independent lines).  
310 There was expression in the vasculature subtending dormant axillary buds, with a sharp boundary at  
311 the base of the bud and no detectable expression in the bud itself (Fig. 3a). Expression was also seen  
312 in the vasculature subtending vegetative and inflorescence SAMs but not in the SAM itself (Fig. S1c).  
313 In *pGLDPA:GFP* lines, no GFP signal was detected outside of the vasculature (Fig. S1d). To confirm  
314 correct transgene expression, immunoblot analyses were performed in extracts of: (i) whole leaves  
315 and (ii) dissected mid-veins, the latter being substantially enriched in vascular tissue. The abundance  
316 of the OtsA protein in vasculature-enriched extracts from the *p35S:otsA* plants was similar to that in  
317 whole-leaf extracts (Fig. 3b), indicating expression at a similar level throughout the leaf. In contrast,  
318 OtsA and CeTPP were more abundant in the vasculature-enriched samples from two independent  
319 *pGLDPA:otsA* and *pGLDPA:CeTPP* lines, respectively, than in the corresponding whole-leaf extracts  
320 (Fig. 3b). Together, the GUS/GFP reporter lines and the immunoblotting data confirm that the *GLDPA*  
321 promoter drives vasculature specific expression of heterologous proteins in arabidopsis.

322 Tre6P was significantly increased in rosettes of the *p35S:otsA* plants (5-fold) as well as in both  
323 *pGLDPA:otsA* lines (2-fold) compared to wild-type Col-0 and control plants (Fig. 3c). The *p35S:otsA* and  
324 *pGLDPA:otsA* lines had lower sucrose levels, resulting in a significantly increased Tre6P:sucrose ratio  
325 in the *p35S:otsA* (10-fold) plants and in both *pGLDPA:otsA* lines (3-fold; Fig. 3c). The *pGLDPA:CeTPP*  
326 lines had significantly higher rosette sucrose levels (Fig. 3c). In vasculature-enriched samples, Tre6P  
327 levels were significantly higher than wild-type in *p35S:otsA* and *pGLDPA:otsA* lines, while the  
328 *pGLDPA:CeTPP* lines had significantly less Tre6P (30-40% lower than wild-type; Fig. 3d).

329 Tre6P has been implicated in transcriptional regulation of *SWEET* expression in sorghum and  
330 maize (Kebrom and Mullett, 2016; Bledsoe et al., 2017; Oszvald et al., 2018). Therefore, we measured  
331 the transcript abundance of *SWEET* and other sucrose transporter (*SUT/SUC*) genes to investigate the  
332 potential impact of increased Tre6P levels in the vasculature on phloem loading of sucrose. Expression  
333 of *otsA* was confirmed in both *pGLDPA:otsA* lines, with no *otsA* transcript being detected in the  
334 *pGLDPA:GUS* control line (Fig. 3e). *SUT1/SUC2* transcript abundance was the same in all genotypes,  
335 but the two *pGLDPA:otsA* lines had 1.5-1.8 times higher levels of *SWEET11* and *SWEET12* transcripts  
336 (Fig. 3f).

337 To follow up these preliminary observations, we measured the transcript abundance of all  
338 four *SWEET* genes (*SWEET11-SWEET14*) that are known to encode plasmalemma sucrose efflux

339 carriers (Chen et al., 2012; Kanno et al., 2016) in leaf 6 (a fully expanded source leaf) and in the rosette  
340 core (enriched in axillary buds) from *pGLDPA:otsA* (line #5) and control *pGLDPA:GUS* plants at 2 d after  
341 bolting (Fig. 4a). *SWEET11* and *SWEET12* were up-regulated about 2.5-fold in the *pGLDPA:otsA* plants  
342 (Fig. 4a), consistent with our previous results based on whole rosette measurements that were  
343 performed at a different biological age and time of the day (Fig. 3f). *SWEET13* was also significantly  
344 up-regulated (3-fold), but *SWEET14* transcripts were not detected (Fig. 4a). In contrast to leaves, there  
345 was no up-regulation of *SWEET11* and *SWEET12* in axillary bud enriched rosette cores but transcripts  
346 of *SWEET13* and *SWEET14* were 3-times more abundant in rosette cores from the *pGLDPA:otsA* plants  
347 than in the controls (Fig. 4a).

348 As previously observed (Schluepmann et al., 2003; Yadav et al., 2014), the *p35S:otsA* plants  
349 had much smaller rosettes and darker green leaves than wild-type Col-0 plants (Fig. S3). Similarly, the  
350 *pGLDPA:otsA* lines had smaller rosettes than wild-type, although not as small as the *p35S:otsA* plants,  
351 whereas the *pGLDPA:CeTPP* lines had slightly bigger leaves than wild-type (Fig. S3).

352 In long-day conditions *p35S:otsA* and *pGLDPA:otsA* plants displayed increased shoot  
353 branching (Fig. 5a). On average, wild-type Col-0 and control plants developed only two to three RI  
354 branches, while the *p35S:otsA* and *pGLDPA:otsA* lines had four to six RI branches (Fig. 5b). RI branch  
355 number in the *pGLDPA:CeTPP* lines was similar to wild-type Col-0 and control plants (Fig. 5b). In  
356 arabidopsis, an axillary bud develops in the axil of each rosette leaf. Therefore, the number of RI  
357 branches per plant is potentially influenced by the number of rosette leaves at the floral transition,  
358 when the plant stops initiating new rosette leaves. Leaf number also influences the overall  
359 photosynthetic capacity and potential sucrose supply of the plant. As total leaf number was decreased  
360 in the *p35S:otsA* and *pGLDPA:otsA* lines and increased in the *pGLDPA:CeTPP* lines (Fig. S4c), the total  
361 number of RI branches was also plotted on a per rosette leaf basis (RI per leaf). The *p35S:otsA* plants  
362 and both *pGLDPA:otsA* lines had twice as many RI per leaf as wild-type and control plants (Fig. 5b),  
363 whereas *pGLDPA:CeTPP* line #4 showed the opposite phenotype, with only half the wild-type number  
364 of RI per leaf (Fig. 5b). The stronger phenotype of *pGLDPA:CeTPP* line #4 compared to line #2 was  
365 consistent with the higher abundance of CeTPP protein in this line (Fig. 3b). In addition to the increase  
366 in RI, the *pGLDPA:otsA* lines also had a significantly increased ratio of secondary (RII) to primary  
367 rosette branches (RII:RI ratio; Fig. 5b), indicating that outgrowth of secondary buds was also  
368 stimulated in these plants. We also determined the number of CI per plant. As the *pGLDPA:otsA* lines  
369 flowered earlier than the controls, they produced fewer CI, whereas the late flowering *pGLDPA:CeTPP*  
370 plants developed more CI (Fig. 5b).

371 Essentially the same effects on shoot branching and leaf number were observed in an  
372 independent experiment where the plants were grown in a slightly longer (18 h) photoperiod (Fig. 5c,

373 S4d). However, when grown in an 18-h photoperiod, total leaf number was similar for *pGLDPA:otsA*  
374 and control plants (Fig. S4d), and there were no differences in CI number, except for *pGLDPA:otsA* line  
375 #1 which had more CI due to formation of a second CI branch at some axils (Fig. S5).

376 To determine if there is also a difference in the rate of branch emergence, the number of RI  
377 was monitored over time in long-day grown plants and plotted against days after bolting. Initiation of  
378 new branches continued for longer in the *p35S:otsA* and *pGLDPA:otsA* (line #5) plants, so by the time  
379 the plants were fully senesced they had more RI per plant and RI per rosette leaf than the control  
380 plants (Fig. 5d). In the *pGLDPA:CeTPP* (line #4) plants, the emergence of lateral branches was slower  
381 than in the control plants (Fig. 5d).

382 As both flowering time and branching were affected in the *pGLDPA:otsA* plants with elevated  
383 Tre6P in the vasculature, we compared the expression levels of *FT* and its close homologue, *TSF*, in  
384 *pGLDPA:otsA* plants with those in a *pGLDPA:GUS* control line. We also included *CONSTANS (CO)* in the  
385 analysis as this is a key regulator of *FT* expression (Turck et al., 2008). Transcript analysis was  
386 performed on the same RNA samples from leaf 6 harvested from *pGLDPA:otsA* and *pGLDPA:GUS*  
387 plants grown in a 16-h photoperiod as described above (Fig. 4b). Compared to the *pGLDPA:GUS*  
388 controls, the *pGLDPA:otsA* plants showed significantly increased expression of *CO* (4.5-fold), *FT* (3-  
389 fold) and *TSF* (5-fold) (Fig. 4b).

390 To summarize, the phenotypes of these transgenic lines demonstrate that: (i) higher Tre6P in  
391 the vasculature (*pGLDPA:otsA*) increased the final number of branches and was associated with up-  
392 regulation of *SWEETs*, *CO*, *FT* and *TSF*; and (ii) lowering Tre6P in the vasculature (*pGLDPA:CeTPP*)  
393 decreased final branch number and strongly delays lateral bud outgrowth.

394

### 395 **Rosette branch number correlates with Tre6P levels in the vasculature**

396 To confirm that the level of Tre6P correlates with bud outgrowth, we assessed the relationship  
397 between Tre6P, sucrose and the Tre6P:sucrose ratio in whole-rosette or vascular-enriched samples  
398 with the number of RI branches per plant and RI branches per leaf, using a Pearson's correlation  
399 analysis. Based on whole rosette measurements, we detected a significant negative correlation of  
400 sucrose levels with RI per plant and with RI per leaf (RI per plant:  $r = -0.813$ ,  $R^2 = 0.66$ ,  $p < 0.026$ ; RI per  
401 leaf:  $r = -0.855$ ,  $R^2 = 0.732$ ,  $p < 0.014$ ). The manipulation of Tre6P in the vasculature influences the  
402 rosette's sucrose levels (see also Fig. 3c) resulting in the negative correlation between sucrose levels  
403 and rosette branching. There was no significant correlation between Tre6P or the Tre6P:sucrose ratio  
404 based on whole rosette measurements. However, based on measurements of vascular enriched  
405 samples, both Tre6P and the Tre6P:sucrose ratio had a highly significant positive correlation with RI  
406 number per plant and an even stronger positive correlation with RI number per leaf (Fig. 6). Thus,

407 theTre6P:sucrose ratio in the vasculature correlates best with the observed branching phenotype in  
408 the *pGLDPA* lines.

409

#### 410 **Interaction between Tre6P and the BRC1 branching signal integrator**

411 To investigate how Tre6P signalling in the vasculature might be integrated with other signalling  
412 pathways that regulate shoot branching, *pGLDPA:otsA* (line #1) was crossed with the *brc1-2* (*brc1*)  
413 mutant. Given the potential role of FT in branching, the up-regulation of *FT* in the *pGLDPA:otsA* plants  
414 and their branching phenotype, we also crossed *pGLDPA:otsA* (line #1) with the *flowering locus t-10*  
415 (*ft*) mutant and analysed RI branch number of plants grown in a 16-h photoperiod.

416 Compared with wild-type Col-0 plants, *pGLDPA:otsA* plants had more branches (on average  
417 3.6 RI branches) than the wild-type (on average 2.5 RI branches; Fig. 7a,c), confirming our previous  
418 results. The total number of RI was also increased in *brc1* (on average nine RI branches) and increased  
419 still further in *brc1* x *pGLDPA:otsA* double mutant plants (on average 15 RI branches; Fig. 7a,c). In  
420 contrast, branching was almost abolished in both the *ft* and *ft* x *pGLDPA:otsA* mutants (on average  
421 fewer than one RI branch; Fig. 7b,c). As seen before, *pGLDPA:otsA* plants flowered earlier than wild-  
422 type plants, as did the *brc1* x *pGLDPA:otsA* and *ft* x *pGLDPA:otsA* lines compared to their respective  
423 *brc1* and *ft* parents (Fig. S6). Given the differences in total leaf number, we also plotted RI on a per  
424 rosette leaf basis. The *brc1* x *pGLDPA:otsA* double mutant had the highest number of RI branches/leaf  
425 (1.0; Fig. 7c), indicating that every axillary rosette bud grew out in this line. The ratio of RI per rosette  
426 leaf was lower in the *brc1* mutant (0.5), the *pGLDPA:otsA* line (0.3) and wild-type plants (0.15). The *ft*  
427 mutant (0.01) and the *ft-10* x *pGLDPA:otsA* double mutant (0.02) had the lowest values. We confirmed  
428 these results in a second independent experiment with the same lines (Fig. S7).

429 In summary, the branching mutant analysis showed that loss of BRC1 and increased Tre6P in  
430 the vasculature had a strong additive effect on shoot branching, while increasing Tre6P in the  
431 vasculature in the *ft* mutant background had no impact on axillary bud outgrowth.

432

## 433 **DISCUSSION**

### 434 **Tre6P acts locally within axillary buds to modulate shoot branching**

435 We previously demonstrated that the breaking of axillary bud dormancy in pea is associated with a  
436 rapid rise in bud Tre6P levels that is highly correlated with bud outgrowth (Fichtner et al. 2017). In  
437 arabidopsis, we observed that the predominant Tre6P-synthesizing enzyme, TPS1, is expressed in  
438 axillary buds, and that complementation of the *tps1-1* mutant by expression of a heterologous TPS  
439 from *E. coli* (*OtsA*) restored shoot branching to wild-type levels (Fig. 1). Together, these results show  
440 that there is enzymatic capacity for Tre6P synthesis in axillary buds and that the influence of TPS1 on

441 shoot branching is primarily due to its Tre6P-synthesizing activity rather than any non-catalytic (e.g.  
442 signalling) function. With TPS1 being present in the buds, we can infer that Tre6P is at least partly  
443 produced locally within the buds in response to any increase in their sucrose supply. Expressing CeTPP  
444 in buds to counteract any rise in their Tre6P levels led to delayed rosette branching in the *pBRC1:CeTPP*  
445 plants in long-days (Fig. 2h) and the suppression of branching in short days (Fig. 2g), providing genetic  
446 evidence that Tre6P acts locally within axillary buds to modulate shoot branching.

447

#### 448 **Tre6P levels in the vasculature regulate shoot branching in arabidopsis**

449 The expression pattern of the *F. trinervia* *GLDPA* promoter is very similar to the expression domain of  
450 the *TPS1* gene in the vasculature (Fichtner et al., 2020), providing a means to investigate the specific  
451 functions of Tre6P in the vasculature. The *pGLDPA:otsA* lines, with increased Tre6P levels only in the  
452 vasculature, displayed an increased branching phenotype to the same degree as *p35S:otsA* plants. Our  
453 observation that the *pGLDPA:CeTPP* plants had the opposite phenotype provides compelling evidence  
454 that these phenotypic differences were driven by changes in Tre6P. Furthermore, there was a strong  
455 correlation between branching and the levels of Tre6P and Tre6P:sucrose ratio in the vasculature.  
456 Given that TPS1 is expressed predominantly in the vasculature (Fichtner et al., 2020) and the  
457 *pGLDPA:otsA* plants flowered early and had as many branches as *p35S:otsA* plants, we conclude that  
458 the vasculature is a primary location for Tre6P synthesis and signalling in the regulation of flowering  
459 and branching.

460

#### 461 **Potential mechanisms for regulation of shoot branching by Tre6P in the vasculature and in axillary** 462 **buds**

463 Altering Tre6P levels in the vasculature could affect shoot branching in several ways. Tre6P produced  
464 in the companion cell-sieve element complex of the vasculature is likely to move with the mass flow  
465 of solutes in the phloem and be delivered to distal sink organs, such as axillary buds, where it might  
466 supplement Tre6P made locally by the TPS1 enzyme in the buds (Fig. 8). In principle, grafting  
467 experiments with *tps1* null mutants would be the simplest approach for testing whether Tre6P does  
468 move from source to sink organs via the phloem, but such experiments are not feasible due to the  
469 embryo lethality of *tps1* null mutants (Eastmond et al., 2002).

470 Tre6P could also have indirect effects in the vasculature by influencing sucrose allocation (Fig.  
471 8). For example, the observed up-regulation of *SWEET11*, *SWEET12* and *SWEET13* in source leaves in  
472 *pGLDPA:otsA* plants (Fig. 3f,4a) could increase the export of sucrose from source leaves and this the  
473 potential supply of sucrose to sink organs, including axillary buds. SWEET-type sucrose efflux carriers  
474 are also involved in phloem unloading in many sink organs (Eom et al., 2015; Milne et al., 2017) and

475 *SWEET13* and *SWEET14* are expressed in or nearby axillary buds (Kanno et al., 2016). Therefore, the  
476 observed up-regulation of *SWEET13* and *SWEET14* in rosette cores of the *pGLDPA:otsA* plants could  
477 indicate increased capacity to deliver sucrose to axillary buds and the SAM. Increasing the supply of  
478 sucrose to axillary buds via such mechanisms would not only provide more carbon and energy for  
479 growth, but could also trigger their release from dormancy and growth into new shoots through a  
480 signalling pathway (Mason et al., 2014). In accordance, lowering Tre6P in developing maize seeds led  
481 to increased yield under well-watered or drought conditions that correlated with upregulation of  
482 *SWEET* transporter genes (Nuccio et al., 2015; Oszvald et al., 2018). Overexpression of *SWEETs* also  
483 leads to more axillary growth in *Chrysanthemum morifolium* (Liu et al., 2020) and early flowering in  
484 arabidopsis (Andrés et al., 2020).

485 A third possibility is that altered Tre6P levels in the vasculature affect other systemic signalling  
486 components and pathways that influence shoot branching. In arabidopsis, the expression of *FT* is  
487 triggered by long days, under the control of CO, and is dependent on the Tre6P-synthesizing activity  
488 of TPS1 (Wahl et al., 2013; Fichtner et al., 2020). *FT* can also move via the phloem to axillary meristems,  
489 and promote their elongation and development by activating their floral transition (Niwa et al., 2013;  
490 Tsuji et al., 2015). Plants with higher Tre6P in the vasculature have early flowering and increased  
491 branching phenotypes, and we observed significant increases in *CO*, *FT* and *TSF* transcript abundance  
492 in the *pGLDPA:otsA* plants (Fig. 4b). This suggested that increased Tre6P levels in the vasculature  
493 induced *CO* expression, thereby increasing expression of *FT* and *TSF*, which in turn could result in early  
494 flowering and increased branching (Fig. 8). Accordingly, stimulation of branching by increased Tre6P  
495 in the vasculature was abolished in an *ft* mutant background (Fig. 7b,c), suggesting that *FT* is a crucial  
496 factor in the ability of axillary buds to respond to distal changes in Tre6P levels (Fig. 8).

497 We also showed that increasing Tre6P in a *brc1* mutant background has a strong additive  
498 effect on branching. This suggests that the stimulation of *FT* expression in the leaf vasculature and loss  
499 of the *FT* repressor in axillary buds (i.e. *BRC1*) act synergistically to bring about the strong branching  
500 phenotype of the *brc1* x *pGLDPA:otsA* plants. In arabidopsis and wheat, the *FT* protein (also *TSF* in  
501 arabidopsis) has been shown to interact directly with *BRC1*, and this interaction leads to a reciprocal  
502 repressive effect, i.e. *FT* and *BRC1* inhibit each other (Niwa et al., 2013; Dixon et al., 2018). Enhanced  
503 *FT* expression in the *pGLDPA:otsA* lines could lead to an accumulation of *FT* protein in the buds shifting  
504 the *FT*:*BRC1* ratio in favour of *FT* leading to the stimulation of bud outgrowth (Fig. 8). It was recently  
505 reported that a potato (*Solanum tuberosum*) tuber-specific isoform of *FT* (*StSP6A*) can interact with  
506 *StSWEET11* to block the leakage of sucrose to the apoplast and promote symplastic transport of  
507 sucrose (Abelenda et al., 2019). Such switches in the pathway of sucrose delivery are a common  
508 feature during the development and growth of sink organs (Weber et al., 1988; Eom et al., 2015; Milne



509 et al., 2017). Thus, distal changes in Tre6P could affect the delivery of sucrose to axillary buds via  
510 changes in *SWEET* expression, or as described above, via FT-mediated changes in the pathway of  
511 phloem unloading in the buds, or both.

512 Lowering bud Tre6P levels, by *pBRC1*-driven expression of CeTPP, delayed bud outgrowth in  
513 long days and suppressed branching in short days, providing genetic evidence that Tre6P acts locally  
514 within axillary buds to modulate shoot branching. This suggests that Tre6P, either by itself or by  
515 potentiating the effect of other signals (e.g. phytohormones), is involved in modulating bud  
516 outgrowth. Low bud Tre6P levels could also compromise Tre6P-driven changes in central metabolism  
517 that are needed for sustained outgrowth (Fichtner et al., 2017). In addition, there are several lines of  
518 evidence that Tre6P associated changes in bud metabolism might also have an impact on auxin  
519 synthesis and signalling. Tre6P promotes the expression of the auxin biosynthesis gene *TRYPTOPHAN*  
520 *AMINOTRANSFERASE RELATED2* in pea seeds (Meitzel et al., 2019) and PINOID1 (PIN1) auxin efflux  
521 proteins become delocalized in meristems when plants have low C status (Lauxmann et al., 2016) and  
522 therefore low Tre6P levels (Lunn et al., 2006).

523 In conclusion, we provide genetic evidence that Tre6P acts locally in axillary buds, showing  
524 that Tre6P in buds is not only correlated with growth (Fichtner et al., 2017), but also necessary for bud  
525 outgrowth. Our results also implicate Tre6P in systemic regulation of bud outgrowth, acting in the  
526 vasculature to signal the overall sucrose status of the plant and control sucrose allocation, and being  
527 linked to photoperiod signalling by FT under long-day conditions. We postulate that Tre6P is a key  
528 factor linking shoot branching to carbon availability, enabling plants to sense and allocate their carbon  
529 resources to an appropriate number of shoot branches, thus helping to optimize shoot architecture  
530 for survival and reproductive success. In future experiments, the level of Tre6P in the vasculature and  
531 axillary buds could be a target for engineering improvements in crop architecture.

532

### 533 **SUPPORTING INFORMATION**

534 **Fig. S1** Tissue specific expression patterns of the *GLDPA* and the *BRC1* promoters in arabidopsis.

535 **Fig. S2** Rosette morphology of arabidopsis plants expressing a heterologous TPP under the control of  
536 an axillary bud-specific promoter (long-day conditions).

537 **Fig. S3** Rosette morphology of arabidopsis plants expressing heterologous TPS or TPP under the  
538 control of constitutive or vasculature-specific promoters (long-day conditions).

539 **Fig. S4** Flowering time of TPS and TPP over-expression lines.

540 **Fig. S5** Cauline branching phenotype of arabidopsis plants expressing a heterologous TPS under the  
541 control of constitutive or vasculature-specific promoters.

542 **Fig. S6** Effects of vasculature-specific TPS overexpression in wild-type and branching mutant  
543 backgrounds on flowering time under long-day conditions.

544 **Fig. S7** Effects of vasculature-specific TPS overexpression in wild-type and branching mutant  
545 backgrounds on flowering and shoot branching under long-day conditions (independent experiment).

## 546 **ACKNOWLEDGEMENTS**

547 We thank Ursula Krause for her excellent help with plant work and immunoblotting, Prof. Dr Peter  
548 Westhoff and his colleagues for providing the *FtGLDPA* promoter, Dr Carlos Figueroa for providing the  
549 anti-CeTPP antibody, Prof. Pilar Cubas for providing the *brc1-2* mutant, and Dr Elizabeth Dun for  
550 helpful comments on the manuscript. This work was supported by a PhD scholarship from the  
551 International Max Planck Research School – Primary Metabolism and Plant Growth (F.F.), the  
552 Australian Research Council (F.F.B.; Discovery grant DP150102086 and Georgina Sweet Laureate  
553 Fellowship FL180100139 to C.A.B.), the Max Planck Society (F.F., M.G.A., R.F., M.S. and J.E.L.) and  
554 Deutsche Forschungsgemeinschaft (DFG; within the Collaborative Research Centre 973; J.J.O.; B.M.-  
555 R.).

## 556 **AUTHOR CONTRIBUTIONS**

557 C.A.B., M.S. and J.E.L conceived the project. F.F. designed and performed all experiments and  
558 measurements with help from F.F.B. and M.G.A. R.F. performed Tre6P measurements. J.J.O. and B.M.-  
559 R. performed sectioning and helped with imaging of stained sections. F.F. and J.E.L wrote the  
560 manuscript with help from F.F.B., M.S. and C.A.B. All authors commented on the manuscript and  
561 approved the final version.

562

563 **REFERENCES**

- 564 Abelenda, J.A., Bergonzi, S., Oortwijn, M., Sonnewald, S., Du, M., Visser, R.G., Sonnewald, U., and  
565 Bachem, C.W.B. (2019). Source-sink regulation is mediated by interaction of an FT homolog with  
566 a SWEET protein in potato. *Current Biology* 29: 1178-1186.e6.
- 567 Aguilar-Martinez, J.A., Poza-Carrion, C., and Cubas, P. (2007). *Arabidopsis* BRANCHED1 acts as an  
568 integrator of branching signals within axillary buds. *Plant Cell* 19: 458-472.
- 569 Andrés, F., Kinoshita, A., Kalluri, N., Fernández, V., Falavigna, V.S., Cruz, T.M.D., Jang, S., Chiba, Y., Seo,  
570 M., Mettler-Altmann, T., Huettel, B., and Coupland, G. (2020). The sugar transporter SWEET10  
571 acts downstream of *FLOWERING LOCUS T* during floral transition of *Arabidopsis thaliana*. *BMC*  
572 *Plant Biology* 20: 1-14.
- 573 Annunziata, M.G., Apelt, F., Carillo, P., Krause, U., Feil, R., Mengin, V., Lauxmann, M.A., Köhl, K.,  
574 Nikoloski, Z., Stitt, M., and Lunn, J.E. (2017). Getting back to nature: a reality check for  
575 experiments in controlled environments. *Journal of Experimental Botany* 68: 4463-4477.
- 576 Aubry, S., Smith-Unna, R.D., Bournnell, C.M., Kopriva, S., and Hibberd, J.M. (2014). Transcript residency  
577 on ribosomes reveals a key role for the *Arabidopsis thaliana* bundle sheath in sulfur and  
578 glucosinolate metabolism. *Plant Journal* 78: 659-673.
- 579 Baker R.F., Leach K.A. and Braun D.M. (2012). SWEET as sugar: new sucrose effluxers in plants.  
580 *Molecular Plant* 5: 766-768.
- 581 Barbier, F.F., Chabikwa, T.G., Ahsan, M.U., Cook, S.E., Powell, R., Tanurdzic, M., and Beveridge, C.A.  
582 (2019a). A phenol/chloroform-free method to extract nucleic acids from recalcitrant, woody  
583 tropical species for gene expression and sequencing. *Plant Methods* 15: 62.
- 584 Barbier, F.F., Dun, E.A., Kerr, S.C., Chabikwa, T.G., and Beveridge, C.A. (2019b). An update on the  
585 signals controlling shoot branching. *Trends in Plant Science* 24: 220-236.
- 586 Barbier, F.F., Lunn, J.E., and Beveridge, C.A. (2015a). Ready, steady, go! A sugar hit starts the race to  
587 shoot branching. *Current Opinion in Plant Biology* 25: 39-45.
- 588 Barbier, F.F., Peron, T., Lecerf, M., Perez-Garcia, M.D., Barriere, Q., Rolcik, J., Boutet-Mercey, S.,  
589 Citerne, S., Lemoine, R., Porcheron, B., Roman, H., Leduc, N., Le Gourrierec, J., Bertheloot, J., and  
590 Sakr, S. (2015b). Sucrose is an early modulator of the key hormonal mechanisms controlling bud  
591 outgrowth in *Rosa hybrida*. *Journal of Experimental Botany* 66: 2569-2582.
- 592 Bennett, T., Liang, Y., Seale, M., Ward, S., Müller, D., and Leyser, O. (2016). Strigolactone regulates  
593 shoot development through a core signalling pathway. *Biology Open* 5:1806-1820.
- 594 Bertheloot, J., Barbier, F., Boudon, F., Perez-Garcia, M. D., Péron, T., Citerne, S., Dun, E., Beveridge, C.,  
595 Godin, C., and Sakr, S. (2020). Sugar availability suppresses the auxin-induced strigolactone  
596 pathway to promote bud outgrowth. *New Phytologist* 225: 866-879.

- 597 Beveridge, C.A., and Murfet, I.C. (1996). The *gigas* mutant in pea is deficient in the floral stimulus.  
598 *Physiologia Plantarum* 96: 637-645.
- 599 Bledsoe, S.W., Henry, C., Griffiths, C.A., Paul, M.J., Feil, R., Lunn, J.E., Stitt, M., and Lagrimini, L.M.  
600 (2017). The role of Tre6P and SnRK1 in maize early kernel development and events leading to  
601 stress-induced kernel abortion. *BMC Plant Biology* 17: 74.
- 602 Braun, N., de Saint Germain, A., Pillot, J. P., Boutet-Mercey, S., Dalmais, M., Antoniadis, I., Li, X., Maia-  
603 Grondard, A., Le Signor, C., Bouteiller, N., Luo, D., Bendahmane, A., Turnbull, C., and Rameau, C.  
604 (2012). The pea TCP transcription factor PsBRC1 acts downstream of strigolactones to control  
605 shoot branching. *Plant Physiology*, 158, 225-238.
- 606 Brewer, P.B., Dun, E.A., Ferguson, B.J., Rameau, C., and Beveridge C.A. (2009). Strigolactone acts  
607 downstream of auxin to regulate bud outgrowth in pea and *Arabidopsis*. *Plant Physiology* 150:  
608 482-493.
- 609 Brewer, P.B., Koltai, H., and Beveridge C.A. (2013). Diverse roles of strigolactones in plant  
610 development. *Molecular Plant* 6: 18-28.
- 611 Chen, L.Q., Qu, X.Q., Hou, B.H., Sosso, D., Osorio, S., Fernie, A.R., and Frommer, W.B. (2012). Sucrose  
612 efflux mediated by SWEET proteins as a key step for phloem transport. *Science* 335: 207-211.
- 613 Claeys, H., Vi, S., Xu, X., Satoh-Nagasawa, N., Eveland, A., Goldshmidt, A., Feil, R., Beggs, G., Sakai, H.,  
614 Brennan, R., Lunn, J.E., and Jackson, D. (2019). Control of meristem determinacy by trehalose-6-  
615 phosphate phosphatases is uncoupled from enzymatic activity. *Nature Plants* 5: 352.
- 616 Clough, S.J., and Bent, A.F. (1998). Floral dip: a simplified method for *Agrobacterium*-mediated  
617 transformation of *Arabidopsis thaliana*. *Plant Journal* 16: 735-743.
- 618 de Jong M., George G., Ongaro V., Williamson L., Willetts B., Ljung K., McCulloch, H., and Leyser, O.  
619 (2014). Auxin and strigolactone signaling are required for modulation of *Arabidopsis* shoot  
620 branching by nitrogen supply. *Plant Physiology* 166: 384–395.
- 621 Delorge, I., Figueroa, C.M., Feil, R., Lunn, J.E., and Van Dijck, P. (2015) TREHALOSE-6-PHOSPHATE  
622 SYNTHASE 1 is not the only active TPS in *Arabidopsis thaliana*. *Biochemical Journal* 466: 283-290.
- 623 Dierck, R., Dhooghe, E., Van Huylenbroeck, J., De Riek, J., De Keyser, E., and Van Der Straeten, D.  
624 (2016). Response to strigolactone treatment in chrysanthemum axillary buds is influenced by  
625 auxin transport inhibition and sucrose availability. *Acta Physiologiae Plantarum* 38: 271.
- 626 Dixon, L. E., Greenwood, J. R., Bencivenga, S., Zhang, P., Cockram, J., Mellers, G., Ramm, K., Cavanagh,  
627 C., Swain, S.M., and Boden, S. A. (2018). TEOSINTE BRANCHED1 regulates inflorescence  
628 architecture and development in bread wheat (*Triticum aestivum* L.). *The Plant Cell* 30: 563-581.
- 629 Domagalska, M.A., and Leyser, O. (2011). Signal integration in the control of shoot branching. *Nature*  
630 *Review Molecular Cell Biology* 12: 211-221.

- 631 Dong, Z., Xiao, Y., Govindarajulu, R., Feil, R., Siddoway, M. L., Nielsen, T., Lunn, J.E., Hawkins, J., and  
632 Chuck, G. (2019). The regulatory landscape of a core maize domestication module controlling bud  
633 dormancy and growth repression. *Nature Communications* 10:1-15.
- 634 Dun, E.A., Brewer, P.B., and Beveridge, C.A. (2009). Strigolactones: discovery of the elusive shoot  
635 branching hormone. *Trends in Plant Sciences* 14: 364-372.
- 636 Dun, E.A., de Saint Germain, A., Rameau, C., and Beveridge, C.A. (2012). Antagonistic action of  
637 strigolactone and cytokinin in bud outgrowth control. *Plant Physiology* 158: 487-498.
- 638 Dun, E.A., de Saint Germain, A., Rameau, C., and Beveridge, C.A. (2013). Dynamics of strigolactone  
639 function and shoot branching responses in *Pisum sativum*. *Molecular Plant* 6: 128-140.
- 640 Eastmond, P.J., van Dijken, A.J.H., Spielman, M., Kerr, A., Tissier, A.F., Dickinson, H.G., Jones, J.D.G.,  
641 Smeekens, S.C., and Graham, I.A. (2002). Trehalose-6-phosphate synthase 1, which catalyses the  
642 first step in trehalose synthesis, is essential for *Arabidopsis* embryo maturation. *Plant Journal* 29:  
643 225-235.
- 644 Engelmann, S., Wiludda, C., Burscheidt, J., Gowik, U., Schlue, U., Koczor, M., Streubel, M., Cossu, R.,  
645 Bauwe, H., and Westhoff, P. (2008). The gene for the P-subunit of glycine decarboxylase from the  
646 C<sub>4</sub> species *Flaveria trinervia*: analysis of transcriptional control in transgenic *Flaveria bidentis* (C<sub>4</sub>)  
647 and *Arabidopsis* (C<sub>3</sub>). *Plant Physiology* 146: 1773-1785.
- 648 Eom J.S., Chen L.Q., Sosso D., Julius B.T., Lin I.W., Qu X.Q., Braun D.M. and Frommer W.B. (2015).  
649 SWEETs, transporters for intracellular and intercellular sugar translocation. *Current Opinion in*  
650 *Plant Biology* 25: 53-62.
- 651 Ferguson, B.J., and Beveridge, C.A. (2009). Roles for auxin, cytokinin, and strigolactone in regulating  
652 shoot branching. *Plant Physiology* 149: 1929-1944.
- 653 Fichtner, F., Barbier, F. F., Feil, R., Watanabe, M., Annunziata, M. G., Chabikwa, T. G., Höfgen, R., Stitt,  
654 M., Beveridge, C.A., and Lunn, J. E. (2017). Trehalose 6-phosphate is involved in triggering axillary  
655 bud outgrowth in garden pea (*Pisum sativum* L.). *Plant Journal* 92: 611-623.
- 656 Fichtner, F., Olas, J.J., Feil, R., Watanabe, M., Krause U, Hoefgen, R., Stitt, M., and Lunn, J. E. (2020).  
657 Functional features of TREHALOSE-6-PHOSPHATE SYNTHASE1 – an essential enzyme in  
658 *Arabidopsis thaliana*). *The Plant Cell* 32: 1949-1972.
- 659 Figueroa, C.M., Feil, R., Ishihara, H., Watanabe, M., Kolling, K., Krause, U., Hohne, M., Encke, B.,  
660 Plaxton, W.C., Zeeman, S.C., Li, Z., Schulze, W.X., Hoefgen, R., Stitt, M., and Lunn, J.E. (2016).  
661 Trehalose 6-phosphate coordinates organic and amino acid metabolism with carbon availability.  
662 *Plant Journal* 85: 410-423.
- 663 Figueroa, C.M., and Lunn, J.E. (2016). A tale of two sugars: trehalose 6-phosphate and sucrose. *Plant*  
664 *Physiology* 172: 7-27.

- 665 Flis, A., Fernández, A. P., Zielinski, T., Mengin, V., Sulpice, R., Stratford, K., Hume, A., Pokhilko, A.,  
666 Southern, M.M., Seaton, D.D., McWatters, H.G. Stitt, M., Halliday, K., and Millar, A.J. (2015).  
667 Defining the robust behaviour of the plant clock gene circuit with absolute RNA timeseries and  
668 open infrastructure. *Open Biology*, 5: 150042.
- 669 Gomez-Roldan, V., Fermas, S., Brewer, P.B., Puech-Pages, V., Dun, E.A., Pillot, J.P., Letisse, F.,  
670 Matusova, R., Danoun, S., Portais, J.C., Bouwmeester, H., Becard, G., Beveridge, C.A., Rameau, C.,  
671 and Rochange, S.F. (2008). Strigolactone inhibition of shoot branching. *Nature* 455: 189-194.
- 672 González-Grandío, E., Poza-Carrión, C., Sorzano, C.O.S., and Cubas, P. (2013). *BRANCHED1* promotes  
673 axillary bud dormancy in response to shade in *Arabidopsis*. *The Plant Cell*: 834-850.
- 674 Hecht, V., Laurie, R.E., Vander Schoor, J.K., Ridge, S., Knowles, C.L., Liew, L. C., Sussmilch, F.C., Murfet,  
675 I.C., Macknight, R.C., and Weller, J. L. (2011). The pea *GIGAS* gene is a *FLOWERING LOCUS T*  
676 homolog necessary for graft-transmissible specification of flowering but not for responsiveness  
677 to photoperiod. *The Plant Cell* 23: 147-161.
- 678 Hellens, R.P., Edwards, E.A., Leyland, N.R., Bean, S., and Mullineaux, P.M. (2000) pGreen: a versatile  
679 and flexible binary Ti vector for *Agrobacterium*-mediated plant transformation. *Plant Molecular*  
680 *Biology* 42: 819-832.
- 681 Kanno, Y., Oikawa, T., Chiba, Y., Ishimaru, Y., Shimizu, T., Sano, N., Koshiba, T., Kamiya, Y., Ueda, M.,  
682 and Seo, M. (2016). AtSWEET13 and AtSWEET14 regulate gibberellin-mediated physiological  
683 processes. *Nature Communications* 7: 1-11.
- 684 Kebrom, T.H., Brutnell, T.P., and Finlayson, S.A. (2010). Suppression of sorghum axillary bud outgrowth  
685 by shade, phyB and defoliation signalling pathways. *Plant, Cell and Environment* 33: 48-58.
- 686 Kebrom, T.H., Chandler, P.M., Swain, S.M., King, R.W., Richards, R.A., and Spielmeier W. (2012).  
687 Inhibition of tiller bud outgrowth in the *tin* mutant of wheat is associated with precocious  
688 internode development. *Plant Physiology* 160: 308-318.
- 689 Kebrom, T.H., and Mullet, J.E. (2016). Transcriptome profiling of tiller buds provides new insights into  
690 PhyB regulation of tillering and indeterminate growth in sorghum. *Plant Physiology* 170: 2232-  
691 2250.
- 692 Koncz, C., and Schell, J. (1986). The promoter of TL-DNA gene 5 controls the tissue-specific expression  
693 of chimaeric genes carried by a novel type of *Agrobacterium* binary vector. *Molecular and General*  
694 *Genetics* 204: 383-396.
- 695 Kormish, J.D., and McGhee, J.D. (2005). The *C. elegans* lethal *gut-obstructed gob-1* gene is trehalose-  
696 6-phosphate phosphatase. *Developmental Biology* 287: 35-47.
- 697 Lalonde, S., Tegeder, M., Throne-Holst, M., Frommer, W., and Patrick, J. (2003). Phloem loading and  
698 unloading of sugars and amino acids. *Plant, Cell and Environment* 26: 37-56.

- 699 Lauxmann, M. A., Annunziata, M. G., Brunoud, G., Wahl, V., Koczut, A., Burgos, A., Olas, J. J.,  
700 Maximova, E., Abel, C., Schlereth, A., Soja, A. M., Bläsing, O. E., Lunn, J. E., and Stitt, M. (2016).  
701 Reproductive failure in *Arabidopsis thaliana* under transient carbohydrate limitation: flowers and  
702 very young siliques are jettisoned and the meristem is maintained to allow successful resumption  
703 of reproductive growth. *Plant, Cell and Environment* 39: 745-767.
- 704 Li, C., Zhang, Y., Zhang, K., Guo, D., Cui, B., Wang, X., and Huang, X. (2015). Promoting flowering, lateral  
705 shoot outgrowth, leaf development, and flower abscission in tobacco plants overexpressing  
706 cotton *FLOWERING LOCUS T (FT)*-like gene *GhFT1*. *Frontiers in Plant Science* 6: 454.
- 707 Liang, W. H., Shang, F., Lin, Q. T., Lou, C., and Zhang, J. (2014). Tillering and panicle branching genes in  
708 rice. *Gene*, 537: 1-5.
- 709 Liu, W., Peng, B., Song, A., Jiang, J., and Chen, F. (2020). Sugar Transporter, CmSWEET17, Promotes  
710 Bud Outgrowth in *Chrysanthemum morifolium*. *Genes*, 11: 26.
- 711 Lunn, J.E., Feil, R., Hendriks, J.H., Gibon, Y., Morcuende, R., Osuna, D., Scheible, W.R., Carillo, P.,  
712 Hajirezaei, M.R., and Stitt, M. (2006). Sugar-induced increases in trehalose 6-phosphate are  
713 correlated with redox activation of ADPglucose pyrophosphorylase and higher rates of starch  
714 synthesis in *Arabidopsis thaliana*. *Biochemical Journal* 397: 139-148.
- 715 Martín-Fontecha, E. S., Tarancón, C., and Cubas, P. (2018). To grow or not to grow, a power-saving  
716 program induced in dormant buds. *Current Opinion in Plant Biology* 41: 102-109.
- 717 Martins, M.C., Hejazi, M., Fettke, J., Steup, M., Feil, R., Krause, U., Arrivault, S., Vosloh, D., Figueroa,  
718 C.M., Ivakov, A., Yadav, U.P., Piques, M., Metzner, D., Stitt, M., and Lunn, J.E. (2013). Feedback  
719 inhibition of starch degradation in *Arabidopsis* leaves mediated by trehalose 6-phosphate. *Plant*  
720 *Physiology* 163: 1142-1163.
- 721 Mason, M.G., Ross, J.J., Babst, B.A., Wienclaw, B.N., and Beveridge, C.A. (2014). Sugar demand, not  
722 auxin, is the initial regulator of apical dominance. *Proceedings of the National Academy of*  
723 *Sciences USA* 111: 6092-6097.
- 724 Meitzel, T., Radchuk, R., McAdam, E. L., Thormählen, I., Feil, R., Munz, E., Hilo, A., Geigenberger, P.,  
725 Ross, J.J., Lunn, J.E., and Borisjuk, L. (2019). Trehalose 6-phosphate controls seed filling by  
726 inducing auxin biosynthesis. *bioRxiv*, 752915.
- 727 Milne, R.J., Perroux, J.M., Rae, A.L., Reinders, A., Ward, J.M., Offler, C.E., Patrick, J.W., and Grof, C.P.L.  
728 (2017). Sucrose transporter localization and function in phloem unloading in developing stems.  
729 *Plant Physiology* 173: 1330-1341.
- 730 Muller, D., and Leyser, O. (2011). Auxin, cytokinin and the control of shoot branching. *Annals of Botany*  
731 107: 1203-1212.

- 732 Murashige, T., and Skoog, F. (1962). A revised medium for rapid growth and bio assays with tobacco  
733 tissue cultures. *Physiologia Plantarum* 15: 473-497.
- 734 Niwa, M., Daimon, Y., Kurotani, K., Higo, A., Pruneda-Paz, J.L., Breton, G., Mitsuda, N., Kay, S.A., Ohme-  
735 Takagi, M., Endo, M., and Araki, T. (2013). BRANCHED1 interacts with FLOWERING LOCUS T to  
736 repress the floral transition of the axillary meristems in *Arabidopsis*. *Plant Cell* 25: 1228-1242.
- 737 Nuccio, M.L., Wu, J., Mowers, R., Zhou, H.-P., Meghji, M., Primavesi, L.F., Paul, M.J., Chen, X., Gao, Y.,  
738 Haque, E., Basu, S.S., and Lagrimini, L.M. (2015). Expression of trehalose-6-phosphate  
739 phosphatase in maize ears improves yield in well-watered and drought conditions. *Nature*  
740 *Biotechnology* 33, 862-869.
- 741 Olas, J. J., Van Dingenen, J., Abel, C., Działo, M. A., Feil, R., Krapp, A., Schlereth, A., and Wahl, V. (2019).  
742 Nitrate acts at the *Arabidopsis thaliana* shoot apical meristem to regulate flowering time. *New*  
743 *Phytologist* 223: 814–827.
- 744 Osuna, D., Usadel, B., Morcuende, R., Gibon, Y., Blasing, O.E., Hohne, M., Günter, M., Kamlage, B.,  
745 Trethewey, R., Scheible, W.R., and Stitt, M. (2007). Temporal responses of transcripts, enzyme  
746 activities and metabolites after adding sucrose to carbon-deprived *Arabidopsis* seedlings. *Plant*  
747 *Journal* 49: 463-491.
- 748 Oszvald, M., Primavesi, L.F., Griffiths, C. A., Cohn, J., Basu, S., Nuccio, M.L., and Paul, M.J. (2018).  
749 Trehalose 6-phosphate regulates photosynthesis and assimilate partitioning in reproductive  
750 tissue. *Plant Physiology* 176: 2623-2638.
- 751 Patrick, J.W., and Colyvas, K. (2014). Crop yield components—photoassimilate supply-or utilisation  
752 limited-organ development? *Functional Plant Biology* 41: 893-913.
- 753 Prusinkiewicz, P., Crawford, S., Smith, R.S., Ljung, K., Bennett, T., Ongaro, V., and Leyser, O. (2009).  
754 Control of bud activation by an auxin transport switch. *Proceedings of the National Academy of*  
755 *Sciences USA* 106: 17431-17436.
- 756 Ramon, M., De Smet, I., Vandesteene, L., Naudts, M., Leyman, B., Van Dijck, P., Rolland, F., Beeckman,  
757 T., and Thevelein, J.M. (2009). Extensive expression regulation and lack of heterologous  
758 enzymatic activity of the Class II trehalose metabolism proteins from *Arabidopsis thaliana*. *Plant,*  
759 *Cell and Environment* 32: 1015-1032.
- 760 Sachs, T., and Thimann, K.V. (1967). The role of auxins and cytokinins in the release of buds from  
761 dominance. *American Journal of Botany* 54: 136-144.
- 762 Satoh-Nagasawa, N., Nagasawa, N., Malcomber, S., Sakai, H., and Jackson, D. (2006). A trehalose  
763 metabolic enzyme controls inflorescence architecture in maize. *Nature* 441: 227-230.



- 764 Schluepmann, H., Pellny, T., van Dijken, A., Smeekens, S., and Paul, M. (2003). Trehalose 6-phosphate  
765 is indispensable for carbohydrate utilization and growth in *Arabidopsis thaliana*. Proceedings of  
766 the National Academy of Sciences USA 100: 6849-6854.
- 767 Seale, M., Bennett, T., and Leyser, O. (2017). BRC1 expression regulates bud activation potential, but  
768 is not necessary or sufficient for bud growth inhibition in Arabidopsis. Development 144:1661-  
769 1673.
- 770 Shimizu-Sato, S., Tanaka, M., and Mori, H. (2009) Auxin-cytokinin interactions in the control of shoot  
771 branching. Plant Molecular Biology 69: 429-435.
- 772 Stitt, M., Lilley, R.M., Gerhardt, R., and Heldt, H.W. (1989). Metabolite levels in specific cells and  
773 subcellular compartments of plant leaves. Methods in Enzymology 174: 518-552.
- 774 Tarancón, C., González-Grandío, E., Oliveros, J.C., Nicolas, M., and Cubas, P., (2017). A conserved  
775 carbon starvation response underlies bud dormancy in woody and Herbaceous Species. Frontiers  
776 in Plant Science 8: 788.
- 777 Tsuji, H., Tachibana, C., Tamaki, S., Taoka, K., Kyojuka, J., and Shimamoto, K. (2015). Hd3a promotes  
778 lateral branching in rice. Plant Journal 82: 256-266.
- 779 Turck, F., Fornara, F., and Coupland, G. (2008). Regulation and identity of florigen: FLOWERING LOCUS  
780 T moves center stage. Annual Review of Plant Biology 59: 573-594.
- 781 Umehara, M., Hanada, A., Yoshida, S., Akiyama, K., Arite, T., Takeda-Kamiya, N., Magome, H., Kamiya,  
782 Y., Shirasu, K., Yoneyama, K., Kyojuka, J., and Yamaguchi, S. (2008). Inhibition of shoot branching  
783 by new terpenoid plant hormones. Nature 455: 195-200.
- 784 Wahl, V., Ponnu, J., Schlereth, A., Arrivault, S., Langenecker, T., Franke, A., Feil, R., Lunn, J.E., Stitt, M.,  
785 and Schmid, M. (2013). Regulation of flowering by trehalose-6-phosphate signaling in *Arabidopsis*  
786 *thaliana*. Science 339: 704-707.
- 787 Wang, L., Sun, S., Jin, J., Fu, D., Yang, X., Weng, X., Xu, C., Li, X., Xiao, J., and Zhang, Q. (2015).  
788 Coordinated regulation of vegetative and reproductive branching in rice. Proceedings of the  
789 National Academy of Sciences USA 112: 15504-15509.
- 790 Weber, H., Heim, U., Golombek, S., Borisjuk, L., Manteuffel, R., and Wobus, U. (1998). Expression of a  
791 yeast-derived invertase in developing cotyledons of *Vicia narbonensis* alters the carbohydrate  
792 state and affects storage functions. Plant Journal 16: 163-172.
- 793 Weng, L., Bai, X., Zhao, F., Li, R., and Xiao, H. (2016). Manipulation of flowering time and branching by  
794 overexpression of the tomato transcription factor SlZFP2. Plant Biotechnology Journal 14: 2310-  
795 2321.
- 796 Wickson, M., and Thimann, K.V. (1958). The antagonism of auxin and kinetin in apical dominance.  
797 Physiologia Plantarum 11: 62-74.

798 Wiludda, C., Schulze, S., Gowik, U., Engelmann, S., Koczor, M., Streubel, M., Bauwe, H., and Westhoff,  
799 P. (2012). Regulation of the photorespiratory *GLDPA* gene in C<sub>4</sub> Flaveria: an intricate interplay of  
800 transcriptional and posttranscriptional processes. *Plant Cell* 24: 137-151.

801 Yadav, U.P., Ivakov, A., Feil, R., Duan, G.Y., Walther, D., Giavalisco, P., Piques, M., Carillo, P., Hubberten,  
802 H.M., Stitt, M., and Lunn, J.E. (2014). The sucrose-trehalose 6-phosphate (Tre6P) nexus: specificity  
803 and mechanisms of sucrose signalling by Tre6P. *Journal of Experimental Botany* 65: 1051-1068.

804 Zakhartsev, M., Medvedeva, I., Orlov, Y., Akberdin, I., Krebs, O., and Schulze, W.X. (2016). Metabolic  
805 model of central carbon and energy metabolisms of growing *Arabidopsis thaliana* in relation to  
806 sucrose translocation. *BMC Plant Biology* 16: 262.

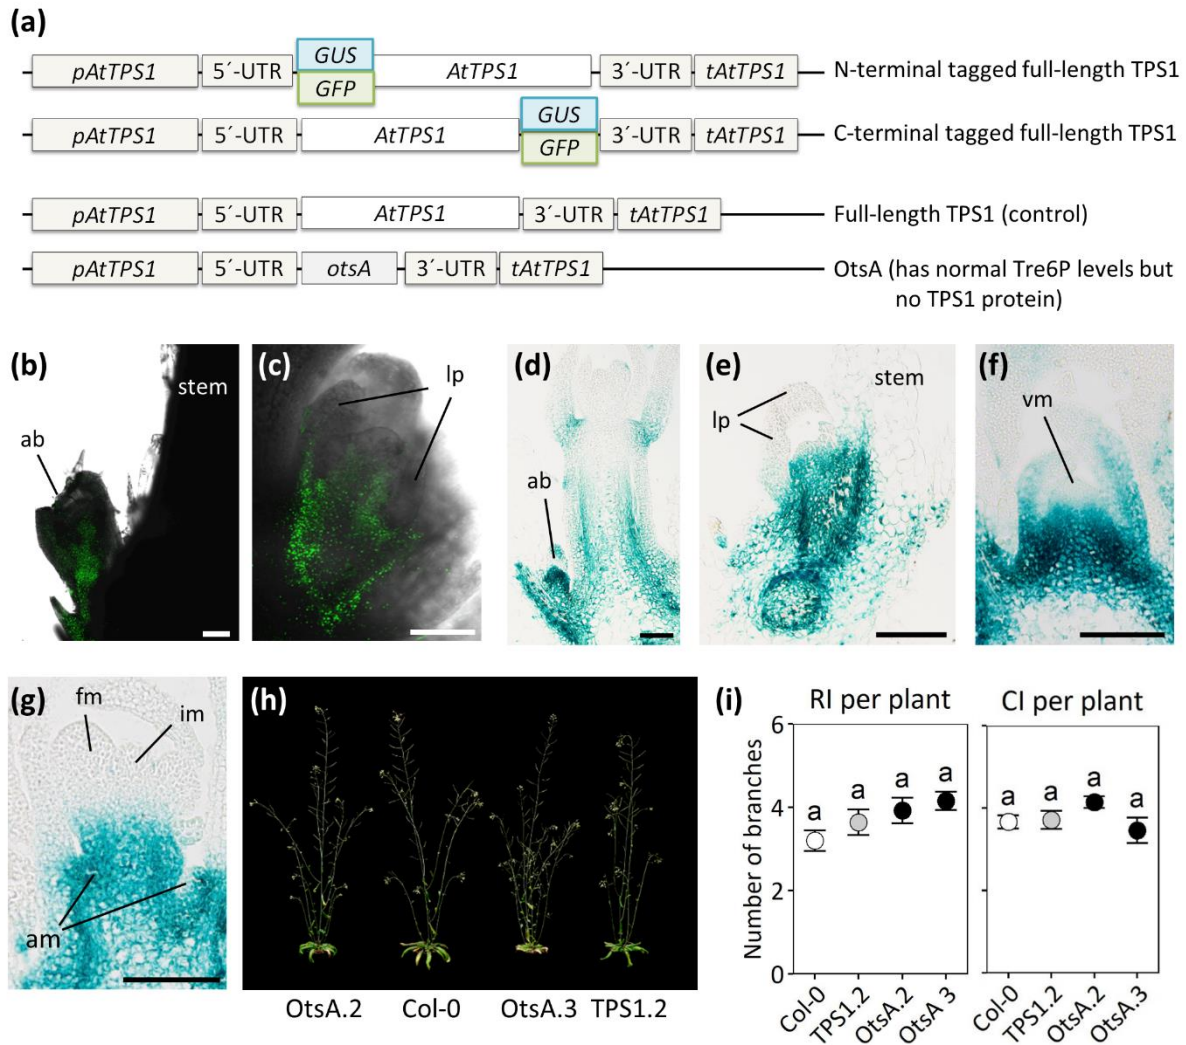

1

2 **Fig. 1** TPS1 localization and Tre6P synthesis during bud development.

3 (a) *TPS1* constructs are derived from the arabidopsis *TPS1* (At1g78580) genomic locus, including the  
 4 native promoter (*pTPS1*) and terminator (*tTPS1*) regions (Fichtner et al., 2020). *TPS1* fusion proteins  
 5 tagged with the GREEN FLUORESCENT PROTEIN (GFP; green box) or the  $\beta$ -GLUCURONIDASE (GUS; blue  
 6 box) were used to analyze the *TPS1* expression pattern. A construct encoding the full-length *TPS1*  
 7 protein was used as a control together with a construct expressing only the heterologous *TPS* from  
 8 *Escherichia coli* (*OtsA*) under the control of the *TPS1* gene regulatory elements (*pTPS1* and *tTPS1*).  
 9 Plants were grown in 16-h photoperiods and stained for GUS activity or examined for GFP. (b-c) *TPS1*-  
 10 GFP fusion protein expression in axillary buds. (d-e) *TPS1*-GUS fusion protein expression in rosette  
 11 axillary buds. *TPS1*-GUS fusion protein expression in (f) vegetative and (g) inflorescence and floral  
 12 meristems. (h) Visual phenotype of wild-type Col-0 plants and full-length *TPS1* as well as *OtsA*  
 13 complemented *tps1-1* plants photographed at 44 DAS. (i) Primary rosette branches (RI) or cauline  
 14 branches (CI) per plant (length  $\geq 0.5$  cm) were counted at the end of the plant's life cycle. Data are  
 15 presented as mean  $\pm$  S.E.M. ( $n = 13-15$ ). Wild-type and transgenic lines complementing the *tps1-1*  
 16 mutant are represented by different symbol colours: Col-0 (white), full length *TPS1* (grey), *OtsA*  
 17 (black). Letters indicate significant differences between treatments according to one-way ANOVA with  
 18 post hoc LSD testing ( $p \leq 0.05$ ). vm, vegetative meristem; im, inflorescence meristem; fm, floral  
 19 meristem; am, axillary meristem; ab, axillary bud; lp, leaf primordia; scale bar = 100 $\mu$ m.

20

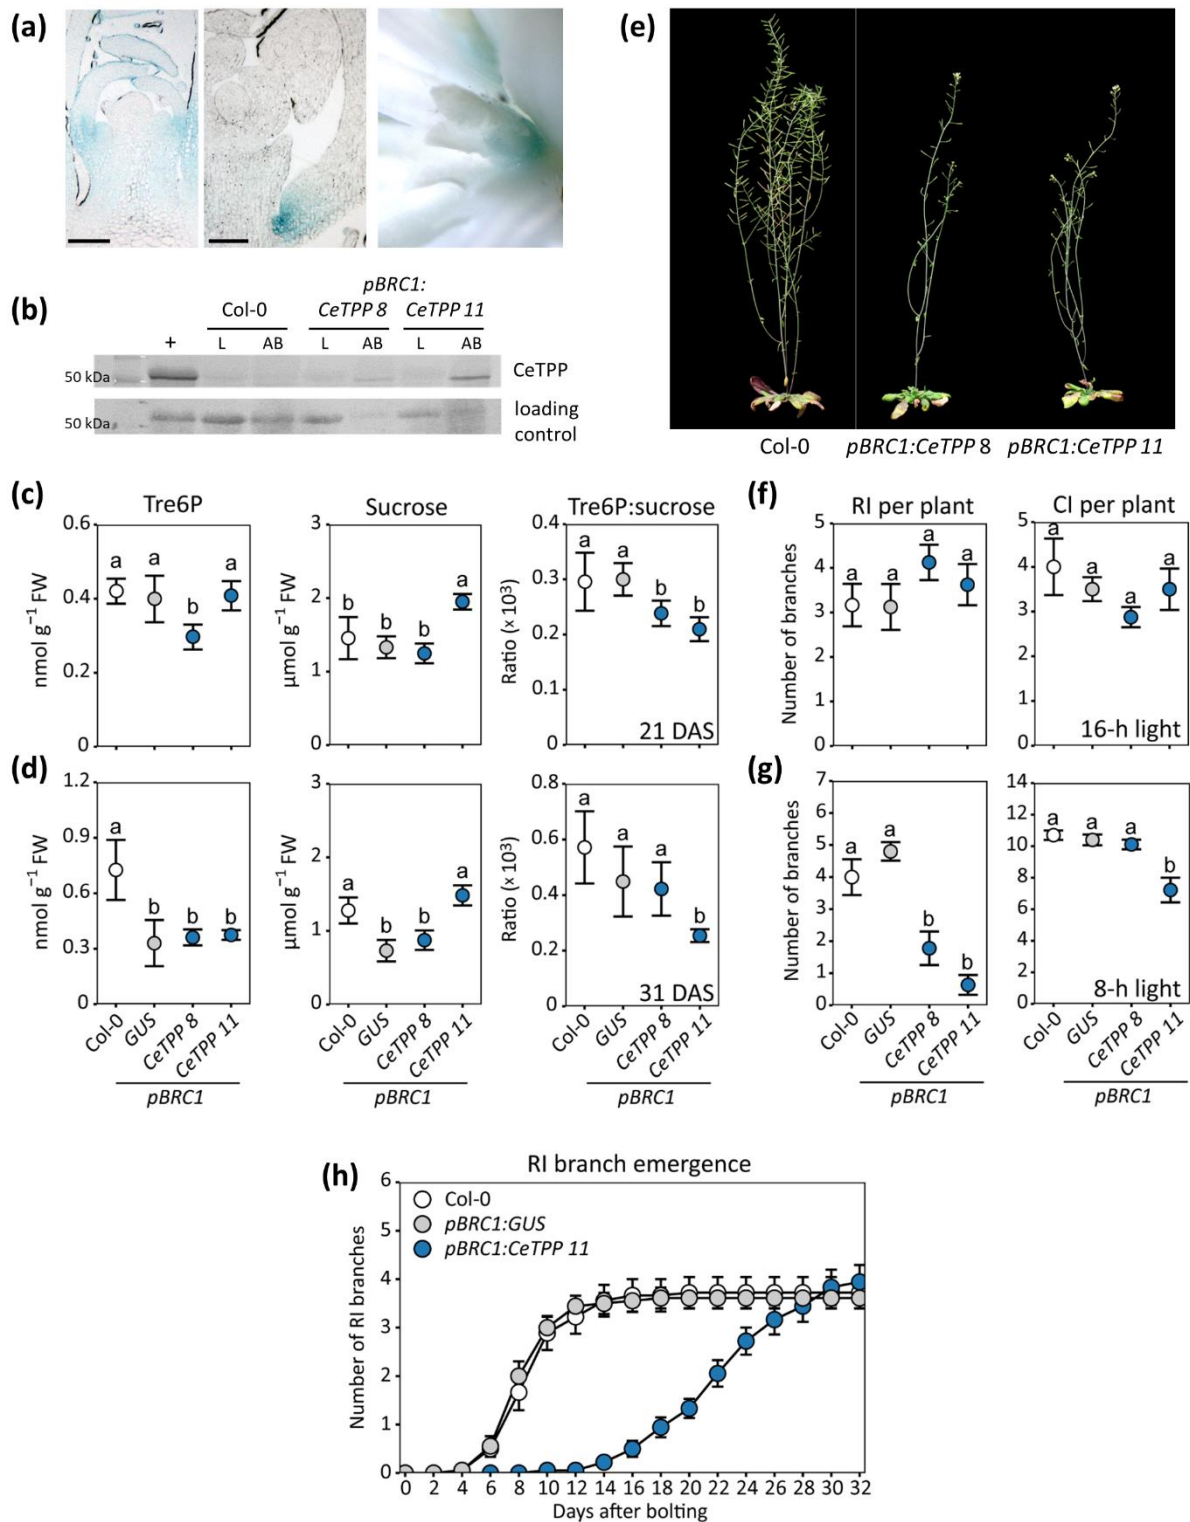

21

22 **Fig. 2** Over-expression of TPP in axillary buds of Arabidopsis.

23 The Arabidopsis *BRANCHED1* promoter (*pBRC1*) was used to drive specific expression in axillary buds.  
 24 (a) The  $\beta$ -GLUCURONIDASE (*GUS*) reporter gene was expressed in Arabidopsis Col-0 plants under the  
 25 control of the *pBRC1* promoter and *GUS* activity was visualized in inflorescence meristems and  
 26 dormant axillary buds. Scale bar = 200  $\mu$ m. (b) Wild-type Col-0 and transgenic *pBRC1:GUS*, or  
 27 *pBRC1:CeTPP* (*Caenorhabditis elegans* *GOB1*) lines were grown in a 16-h photoperiod. Leaves (L) and  
 28 axillary buds (AB) were harvested around ZT10 for immunoblotting to detect expression of

29 heterologous CeTPP proteins. Parallel samples of rosette cores were harvested at ZT10 from plants at  
30 (c) 21 and (d) 31 DAS for metabolite analyses. Data are presented as mean  $\pm$  S.D. ( $n = 4$ ). (e) Visual  
31 phenotypes of *pBRC1:CeTPP* arabidopsis plants photographed approx. 18 days after bolting. Primary  
32 rosette (RI) or cauline (CI) branches were counted (f) in 16-h or (g) 8-h photoperiods. (h) The number  
33 of RI branches (length  $\geq 0.5$  cm) per plant was counted at 2-d intervals after bolting in a 16-h  
34 photoperiod. Branches (length  $\geq 0.5$  cm) were counted at the end of the plant's life cycle. Data are  
35 shown as mean  $\pm$  S.E.M. ( $n = 8-18$ ). Wild-type and transgenic lines expressing heterologous proteins  
36 are represented by different symbol colours: Col-0 (white), GUS (grey), and CeTPP (blue). Letters  
37 indicate significant differences between treatments according to one-way ANOVA with post hoc LSD  
38 testing ( $p \leq 0.05$ ). +, positive control.

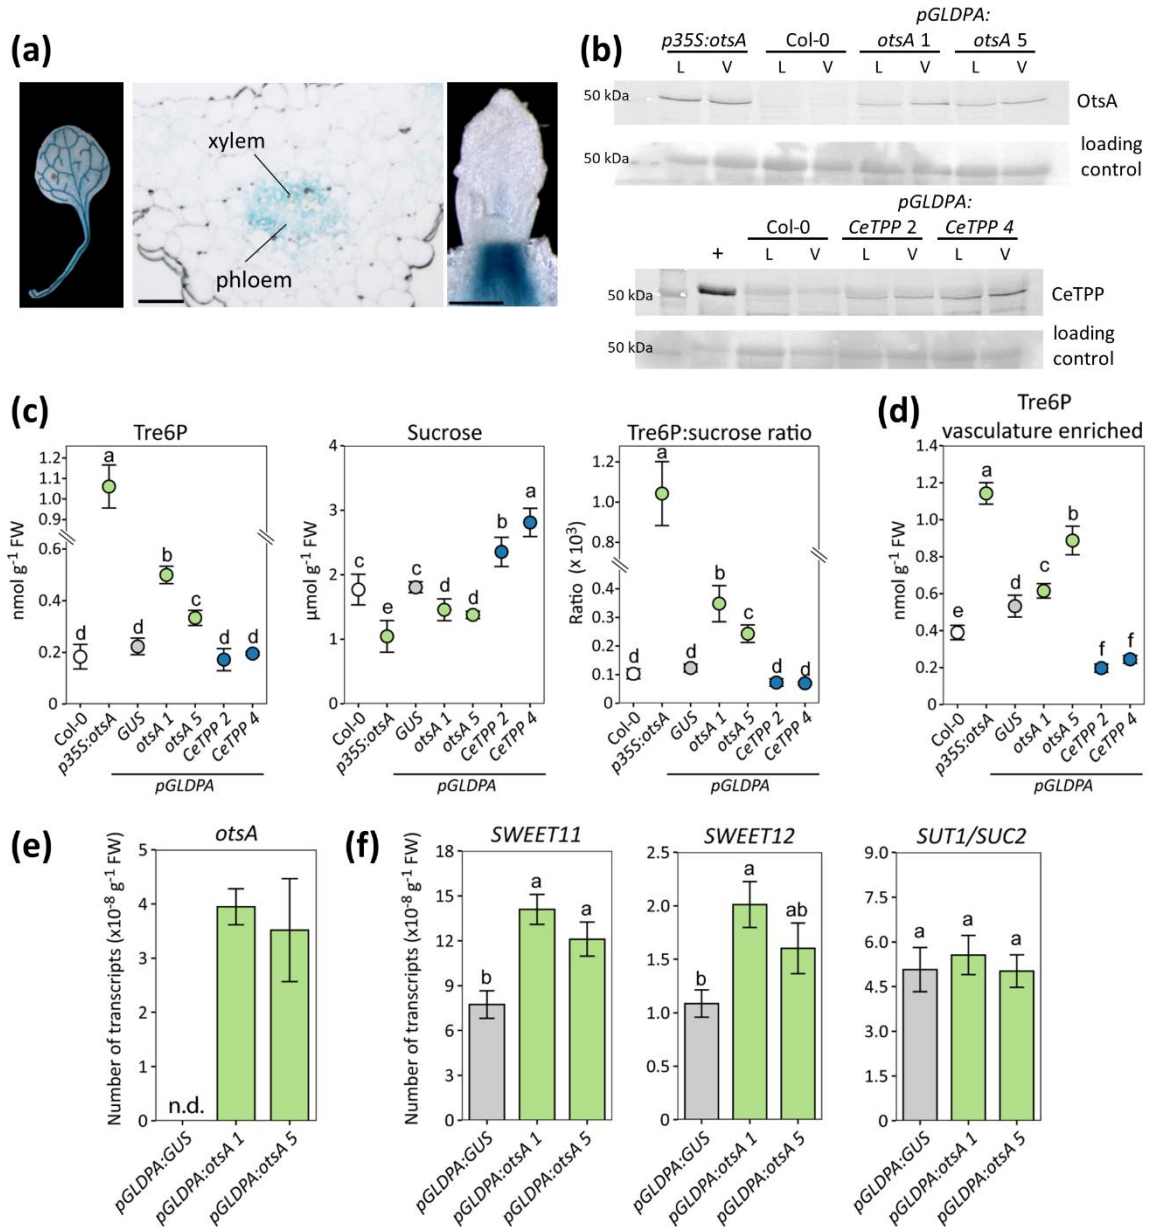

39

40 **Fig. 3** Over-expression of TPS or TPP in the vasculature of Arabidopsis.

41 The *Flaveria trinervia* GLYCINE-DECARBOXYLASE P-SUBUNIT A promoter (*pGLDPA*) was used to drive  
 42 specific expression in the vasculature of Arabidopsis. (a) The β-GLUCURONIDASE (*GUS*) reporter was  
 43 expressed in Arabidopsis Col-0 plants under the control of *pGLDPA* and *GUS* activity was visualized in  
 44 rosette leaves, transverse sections of the mid-vein region of fully expanded leaves and in dormant  
 45 axillary buds. Scale bar = 100 μm. (b) Wild-type Col-0 and transgenic *p35S:otsA* (*Escherichia coli otsA*),  
 46 *pGLDPA:GUS*, *pGLDPA:otsA* and *pGLDPA:CeTPP* (*Caenorhabditis elegans GOB1*) lines were grown in a  
 47 16-h photoperiod. Leaves (L) and vasculature-enriched (V) tissues were harvested at ZT10 from plants  
 48 at 20 DAS to detect expression of heterologous TPS (OtsA) or TPP (CeTPP) proteins by immunoblotting.  
 49 Parallel samples of whole rosettes (c) or vasculature-enriched tissue (d) were collected for metabolite  
 50 analyses. Data are presented as mean ± S.D. (*n* = 4). (e) Transcript abundance of the *otsA* gene in  
 51 rosettes from plants grown under long-day conditions and harvested at ZT10 at 24 DAS. (f) Transcript  
 52 abundance of *SUT1/SUC2*, *SWEET11* and *SWEET12* in the same samples as (E). Data are presented as  
 53 mean ± S.E.M. (*n* = 4 biological replicates). Wild-type and transgenic lines expressing heterologous

54 proteins are represented by different symbol colours: Col-0 (white), GUS (grey), OtsA (green) and  
55 CeTPP (blue). Letters indicate significant differences between treatments according to one-way  
56 ANOVA with post hoc LSD testing ( $p \leq 0.05$ ). +, positive control; n.d., not detected.

57

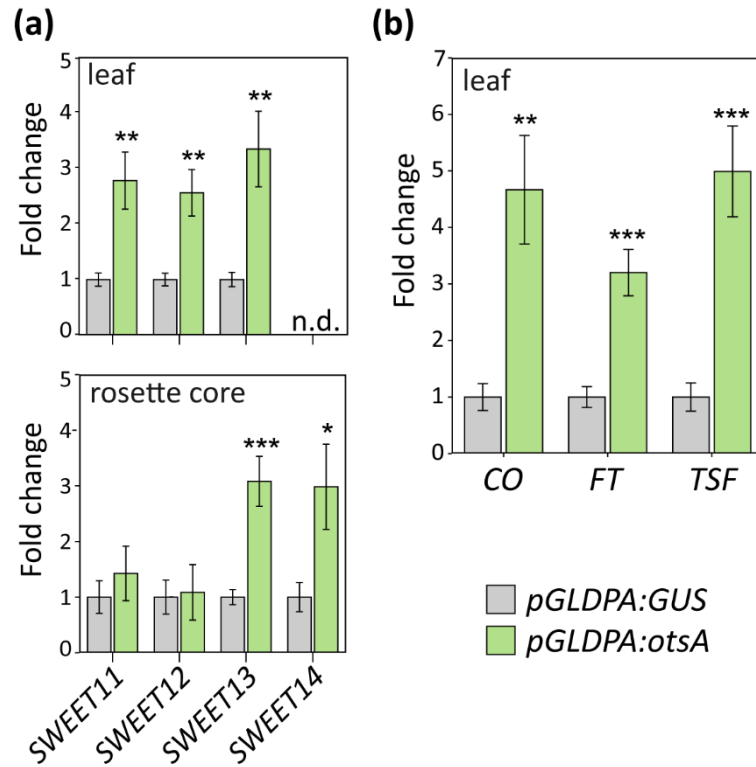

58

59 **Fig. 4** Gene expression analyses in Arabidopsis plants with altered Tre6P levels in the vasculature.

60 *pGLDPA:otsA* (green bars) and *pGLDPA:GUS* (grey bars) plants were grown in a 16-h photoperiod. Fully  
61 expanded leaves (leaf 6) and rosette cores were harvested at ZT 14 on day 2 after bolting, i.e. after  
62 the floral transition but before axillary bud outgrowth. (a) Abundance of *SWEET11*, *SWEET12*,  
63 *SWEET13* and *SWEET14* transcripts. (b) Abundance of *CONSTANS* (*CO*), *FLOWERING LOCUS T* (*FT*) and  
64 *TWIN SISTER OF FLOWERING LOCUS T* (*TSF*). Data from the *pGLDPA:otsA* plants are expressed as fold-  
65 change with respect to the *pGLDPA:GUS* controls, and shown as mean  $\pm$  S.E.M. ( $n = 8$  biological  
66 replicates). Asterisks show significant differences between the genotypes according to Student's t-  
67 test: \*  $p < 0.05$ , \*\*  $p < 0.01$ , \*\*\*  $p < 0.001$ . n.d., not detected.



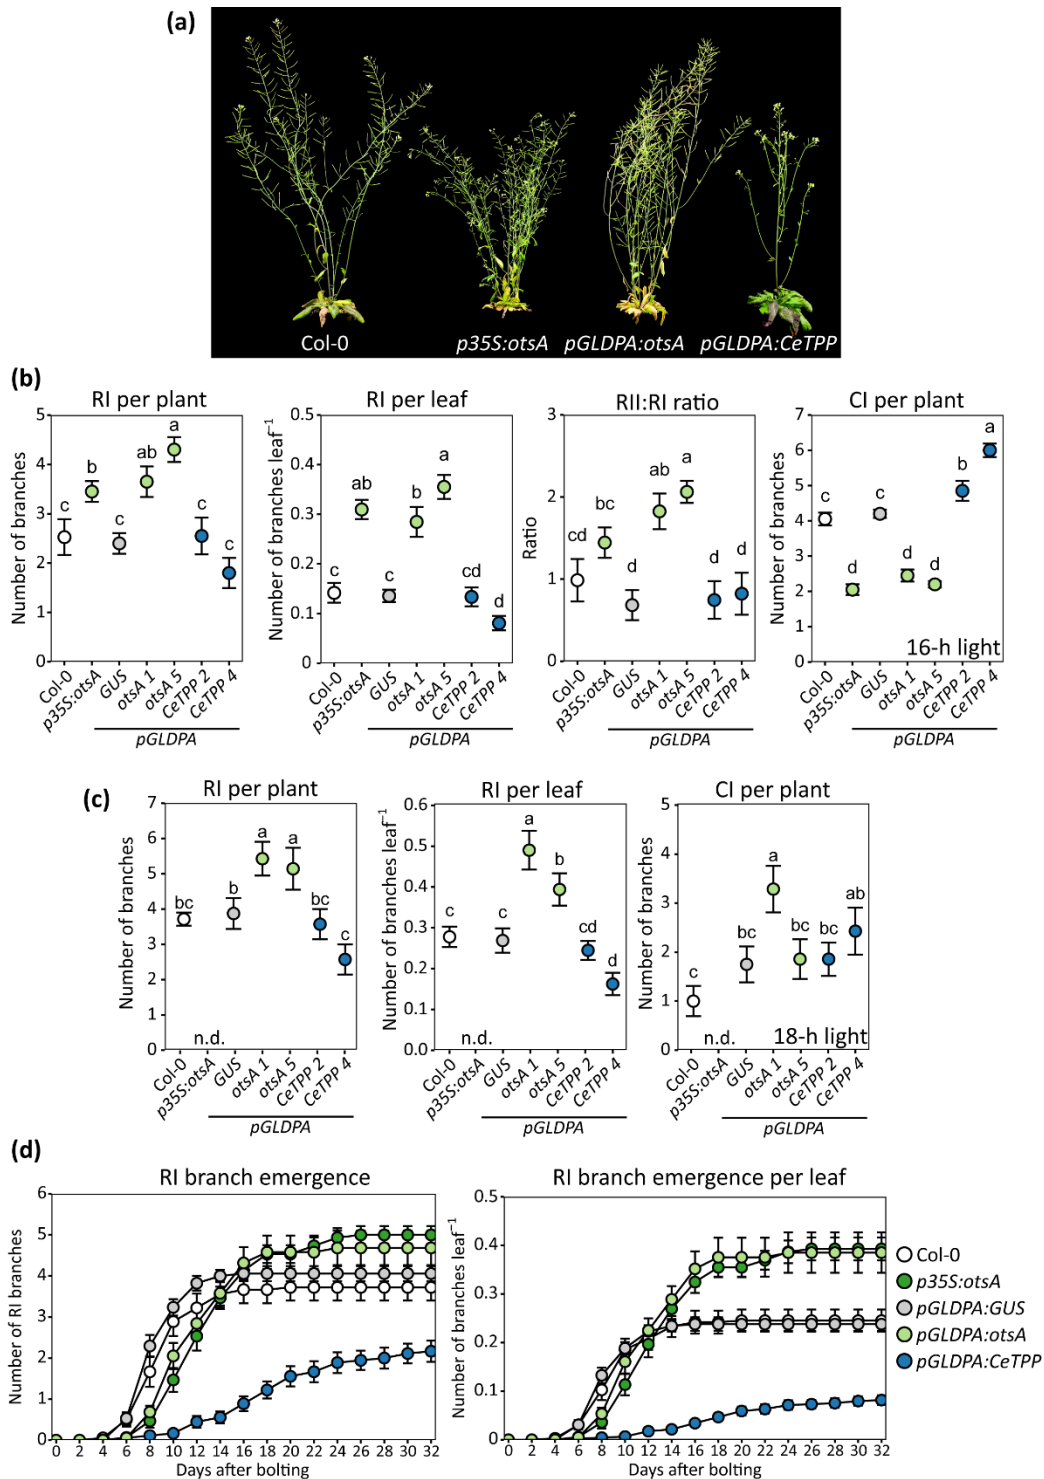

68

69 **Fig. 5** Axillary bud growth analysis in arabidopsis plants with altered Tre6P levels in the vasculature.

70 (a) Visual phenotypes of arabidopsis *p35S:otsA*, *pGLDPA:otsA* and *pGLDPA:CeTPP* plants, grown in a  
 71 16-photoperiod and photographed at 56 DAS. Primary rosette branches (RI) per plant, RI branches per  
 72 rosette leaf, ratio of secondary (RII) and RI branches and primary cauline branches (CI) per plant were  
 73 counted in (b) 16-h or (c) 18-h photoperiods. (d) The number of RI branches per plant and per leaf was  
 74 counted at 2-d intervals after bolting of plants grown in a 16-h photoperiod (n.b. the wild-type data  
 75 are from plants grown under identical conditions and are the same as those shown in Fig. 2h).  
 76 Branches (length  $\geq 0.5$  cm) were counted at the end of the plant's life cycle. Data are shown as mean

77 ± S.E.M. ( $n = 8-20$ ). Wild-type and transgenic lines expressing heterologous proteins are represented  
78 by different symbol colours: Col-0 (white), GUS (grey), OtsA (green) and CeTPP (blue). Letters indicate  
79 significant differences between genotypes according to one-way ANOVA with post hoc LSD testing ( $p$   
80  $\leq 0.05$ ). n.d., not determined.

81

82

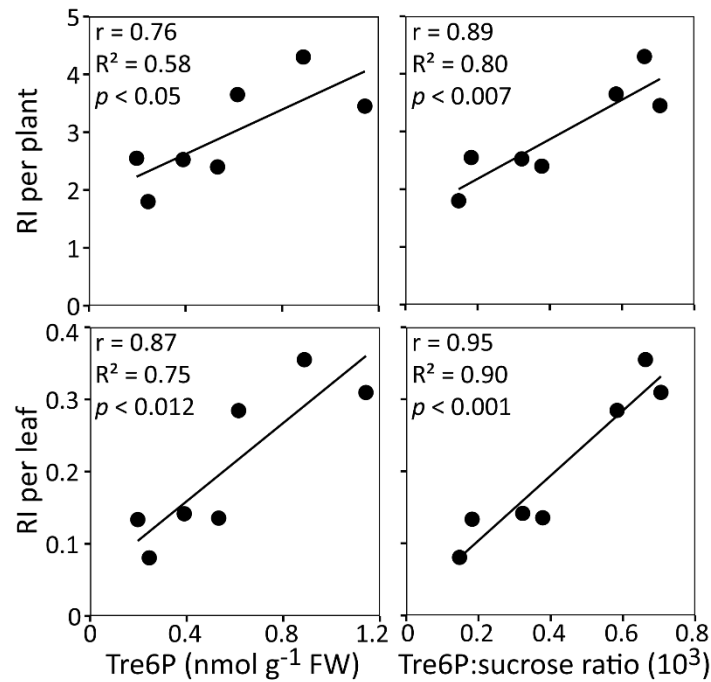

83

84 **Fig. 6** Correlation analyses in Arabidopsis plants with altered Tre6P levels in the vasculature.

85 (A) The number of RI branches per plant and per leaf of *pGLDPA:otsA*, *pGLDPA:CeTPP*, *pGLDPA:GUS*,  
86 *p35S:otsA* and wild-type Col-0 plants were plotted against the level of Tre6P and the Tre6P:sucrose  
87 ratio measured in vasculature-enriched tissue samples. Plants were grown in 16-h photoperiods. The  
88 Pearson correlation coefficient (*r*), coefficient of determination (*R*<sup>2</sup>) and probability (*p*) values for each  
89 relationship are indicated.

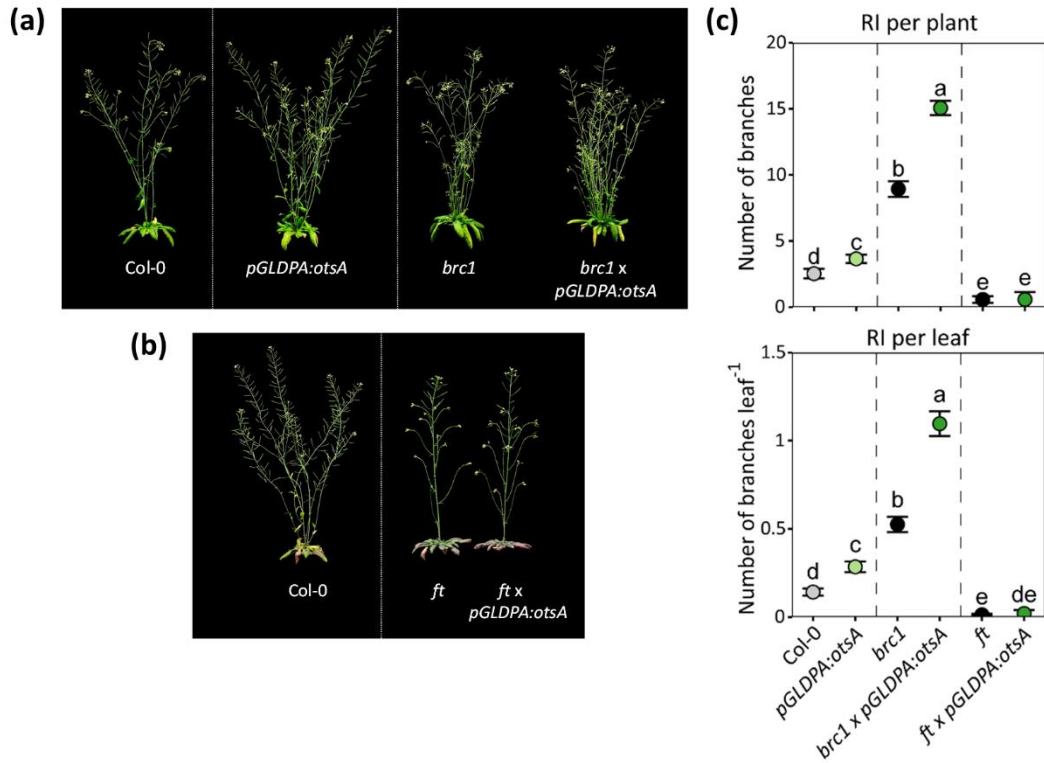

90

91 **Fig. 7** Effects of vasculature-specific TPS overexpression in wild-type and branching mutant  
 92 backgrounds on flowering and shoot branching under long-day conditions.

93 Visual phenotypes of (a) *branched1 (brc1)* and (b) *flowering locus t (ft)* mutants and plants expressing  
 94 the *Escherichia coli* TPS (OtsA) in the vasculature (*pGLDPA:otsA*) in these mutant backgrounds grown  
 95 in a 16-h photoperiod. Plants were grown in a 16-h photoperiod and photographed at 45 (a) or 56 (b)  
 96 DAS. (c) Primary rosette branches (RI) per plant, flowering time based on total leaf number and RI  
 97 branches per rosette leaf. Symbol colours: wild-type *Col-0* (grey); *brc1*, *ft* parental mutants (black);  
 98 *pGLDPA:otsA* expression in a wild-type background (light green); *pGLDPA:otsA* expression in a mutant  
 99 background (dark green). RI branches (length  $\geq 0.5$  cm) were counted at the end of the plant's life  
 100 cycle. Data are presented as mean  $\pm$  S.E.M. ( $n = 11-19$ ) and letters indicate significant differences  
 101 between genotypes according to one-way ANOVA with post hoc LSD testing ( $p \leq 0.05$ ).

102

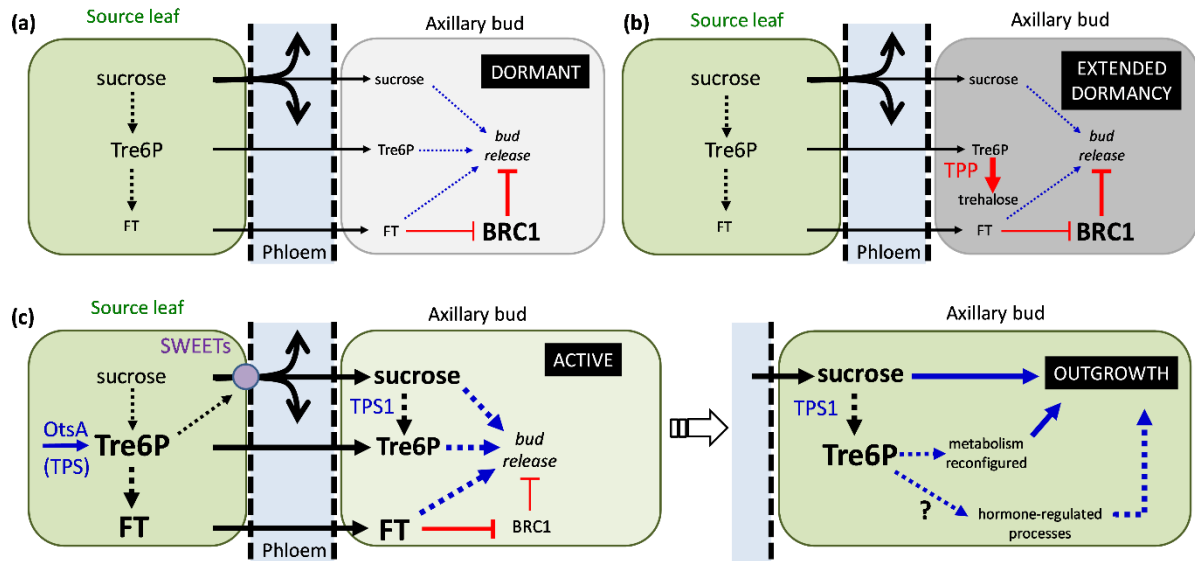

103

104 **Fig. 8** Schematic model for the role of Tre6P in axillary bud outgrowth in arabidopsis.

105 (a) Limited supply of sucrose to axillary buds and strong expression of BRANCHED1 (BRC1) maintains  
 106 bud dormancy. (b) Bud-specific expression of a heterologous TPP in *pBRC1:CeTPP* lines lowers Tre6P  
 107 levels in the buds, further delaying their release from dormancy. (c) Expression of a heterologous TPS  
 108 (*OtsA*) in *pGLDPA:otsA* lines increases Tre6P in the phloem parenchyma and companion cell-sieve  
 109 element complex in leaf veins, leading to up-regulation of SWEET sucrose efflux carriers, enhanced  
 110 phloem loading of sucrose and increased sucrose supply to axillary buds. Higher sucrose stimulates  
 111 local synthesis of Tre6P in the buds by TPS1 (additional Tre6P might also move from leaves to buds  
 112 via the phloem). In parallel, high Tre6P in companion cells stimulates expression of *FLOWERING LOCUS T*  
 113 (*FT*). Movement of the phloem-mobile FT protein to buds leads to inhibition of BRC1. High sucrose,  
 114 high Tre6P and FT act synergistically to trigger the release of bud dormancy. Following release from  
 115 dormancy, Tre6P sustains bud outgrowth by coordinating a reconfiguration of bud metabolism for  
 116 growth and via interaction with hormone-regulated processes (e.g. stimulating establishment of polar  
 117 auxin transport from the new shoot).
